# Supplementary material
Source: PubMed Central journal article supplement (PMC6583789)
Supplement: NIHMS1526814-supplement-Supplementary_information_for_Methods_section.pdf [file NIHMS1526814-supplement-Supplementary_information_for_Methods_section.pdf]

1 **Supplementary Information for**

2  
3 **Hypo-Osmotic-Like Stress Underlies General Cellular Defects of Aneuploidy**

4  
5 Hung-Ji Tsai<sup>1</sup>, Anjali R. Nelliath<sup>1,2</sup>, Mohammad Iqbal Choudhury<sup>3</sup>, Andrei Kucharavy<sup>1</sup>, William D.  
6 Bradford<sup>4</sup>, Malcolm E Cook<sup>4</sup>, Jisoo Kim<sup>1</sup>, Devin B. Mair<sup>6</sup>, Sean X. Sun<sup>2,3</sup>, Michael C. Schatz<sup>5</sup>, Rong  
7 Li<sup>1,2,\*</sup>

8  
9 <sup>1</sup>Center for Cell Dynamics, Department of Cell Biology, Johns Hopkins University School of Medicine,  
10 Baltimore, MD 21205

11 <sup>2</sup>Department of Chemical and Biomolecular Engineering, Whiting School of Engineering, Johns  
12 Hopkins University, Baltimore, MD 21218

13 <sup>3</sup>Department of Mechanical Engineering, Whiting School of Engineering, Johns Hopkins University,  
14 Baltimore, MD, 21218

15 <sup>4</sup>Stowers Institute for Medical Research, Kansas City, MO 64110

16 <sup>5</sup>Department of Computer Science, Johns Hopkins University, Baltimore, MD, 21218

17 <sup>6</sup>Department of Biomedical Engineering, Johns Hopkins University School of Medicine, Baltimore, MD  
18 21205

19 \*To whom correspondence should be addressed: [rong@jhu.edu](mailto:rong@jhu.edu)

20  
21 • **Supplementary Methods**

22 **1. Experimental Methods**

23 **2. Mathematical and biophysical models**

24 • **Supplementary References**

25 • **Supplementary Method Figures**

26 • **Supplementary Table List**

27

## 28 **Supplementary Methods**

### 29 **1. Experimental Methods**

#### 30 **Yeast strain constructions and growth conditions**

31 All yeast strains in this study were derivatives of *S. cerevisiae* BY4741, listed in Supplementary  
32 Table 9. Triploid yeast strains were generated by cycles of mating type switching and mating from haploid  
33 BY4741 as described in previous work<sup>1</sup>. Plasmid pRS315-*STE2pr-spHIS5* (RLB967) were constructed in  
34 this study by using primers ((Forward: ctccaccgcggtggcggccgcATCAGGGAATCCCTTT TTG and Reverse:  
35 ccactagttagagcggccgcACTCCGTCTGCTTTCTTTTC) amplifying *STE2pr-spHIS5* cassette in Y7092  
36 strain and subsequently subcloned into *NotI* site of pRS315<sup>2</sup>. To generate a karyotypically heterogeneous  
37 aneuploid population, triploid or diploid yeast with pRS315-*STE2pr-spHIS5* were grown in SD-LEU  
38 media overnight and then transferred into sporulation media (Super Sporulation Media; 1% potassium  
39 acetate and 0.02% raffinose). Cells were sporulated at 23°C for five days or until tetrads could be observed  
40 under microscope and then grown on SD-LEU-HIS plates for four to five days. Colonies were randomly  
41 picked up for overnight culture in 250 µl of YPD rich media. For the experiments in this study, at least 90  
42 or 180 aneuploid colonies (one or two 96 well plates of cultures) were cultured individually in 96 well  
43 deep-well plates, and after 14-16 hours, each culture was normalized to the same cell number based on  
44 optical density (OD 600) before being pooled as a population. In parallel, at least six haploid colonies  
45 were cultured in the same plate as a control population in each experiment. To allow aneuploid cells to  
46 proceed through mitotic processes slowly maintaining the diverse karyotypes in an aneuploid cell  
47 population, aneuploid colonies were grown at 23°C or 25°C (room temperature) when cultured in a high-  
48 throughput format or 96 well deep-well plates. After being pooled as a population, haploid and aneuploid

49 populations were refreshed at OD= 0.2 to 0.3 with rich YPD or SC complete media for at least two hours  
50 at an optimal 30°C condition, unless indicated.

51 Triploid and diploid strains with ORF-GFP tag were either constructed by genomic integration of  
52 PCR-amplified GFP cassette from pKT209 or originated from the GFP fusion collection before cycles of  
53 mating type switching and mating<sup>3,4</sup>. When generating aneuploid strains harboring genes with a GFP tag,  
54 the cells after sporulation were grown on SD-LEU-HIS-URA plates to ensure every aneuploid cell carried  
55 the GFP-tagged allele. After colonies were grown on the plate, as described above, cells were grown  
56 individually in rich YPD or SC complete media to generate aneuploid populations.

57

## 58 **Experiments involving hypo- or hyper-osmotic shock**

59 To examine phenotypes of cells experiencing osmotic shift, cells were first grown overnight (14-  
60 16 hours) in SC complete media with or without 1M sorbitol for later hypo- or hyper-osmotic shock  
61 experiments, respectively. Cells were sub-cultured in the same media for two-three hours and transferred  
62 into media with a lower concentration of or without sorbitol, or a higher concentration of sorbitol, to  
63 observe phenotypes under hypo- or hyper-osmotic shock, respectively. In the experiments testing the  
64 transcriptional responses and zymolyase sensitivity (Extended Data Fig. 2e and 4c), cells were collected  
65 or monitored every 15 minutes after less than a minute of the osmotic shift. For microscopy-based assays,  
66 such as endocytosis assay (Extended Data Fig. 7a and 7d), FM6-64 internalization assay (Fig. 2e), and  
67 Hog1 localization (Extended Data Fig. 2f), cells were monitored immediately after the osmotic shift for  
68 time-lapse imaging at 200 milliseconds or one-minute time intervals. For cell size measurement (Extended  
69 Data Fig. 7b and 7e), cells were imaged at 20 minutes after osmotic shift and finished in 10 minutes,  
70 within the time frame of ongoing osmotic adaptation (Gasch et al.<sup>5</sup>, Miermont et al.<sup>6</sup>, Granados et al.<sup>7</sup> and

71 Extended Data Fig. 2f). AFM measurements (Extended Data Fig. 3 and 7c) were made immediately after  
72 osmotic shift and finished within 30 minutes of that osmotic shift which gave us enough time to set up the  
73 microscopy devise and to measure enough cells. In all experiments, haploid and aneuploid populations  
74 were subjected to the same timeline of treatments.

75

## 76 **Whole genome DNA and RNA sequencing analysis in haploid and aneuploid populations**

77 We first employed a general statistical model to estimate the required minimum population size  
78 of aneuploid cells sufficient to nullify copy number variation across chromosomes in a karyotypically  
79 heterogeneous aneuploid population (see details in 2. Mathematical and biophysical models).

80 Three independent triploid colonies (RLY9596) and two independent diploid colonies (RLY9593)  
81 were grown overnight in SD-LEU media and then transferred into sporulation media. After five days of  
82 sporulation at 23°C, tetrads can be observed under a microscope. Two independent strategies were used  
83 to generate aneuploid progeny, mating type A (*MATa*)-specific selection (Extended Data Fig. 1a) and  
84 conventional tetrad dissection. First, 40 µl of sporulated triploid and diploid cultures were plated and  
85 selectively grown on five and two SD-LEU-HIS agar plates, respectively, for five days at 23°C (15 agar  
86 plates of aneuploid progeny and four agar plates of haploid progeny). Colonies were randomly picked  
87 from plates and inoculated into thirty 96 well deep-well plates with 200 µl of rich YPD media (without  
88 any auxotrophic selection) in each well and then grown overnight (14-16 hours) at 23°C. In total, 2880  
89 aneuploid colonies were independently grown and refreshed by adding additional 300 µl of YPD rich  
90 media on the second day followed by incubation for four to five hours at 23°C. Then, 50 µl of culture from  
91 each well were pooled together; thirty 96 well plates were pooled into three separate groups (each group  
92 includes ten plates of cultures) as biological replicates for later DNaseq and RNAseq analysis. A haploid

93 cell population consisting of 192 individual haploid colonies (two 96 well plates) was generated at the  
94 same time by the same procedures as a reference genome.

95 In parallel, conventional tetrad dissection was used to generate aneuploid cell populations without  
96 any auxotrophic selection throughout the entire process. 500 tetrads from sporulated triploids and 24  
97 tetrads from sporulated diploids were dissected under the microscope (2000 aneuploid and 96 haploid  
98 progeny) and grown at 23°C for six days. Roughly 48% of aneuploid progeny were viable (visible as a  
99 colony) to be inoculated in 200 µl of YPD media overnight and refreshed for five hours on the second day.  
100 Cultures of 952 individual aneuploid colonies were pooled into two separate groups (480 and 472  
101 aneuploid colonies, respectively), while 96 haploid progeny were pooled into one group as a reference  
102 group for later analyses. Notably, no significant germination defects were observed in both aneuploid and  
103 haploid progeny while the majority of the aneuploid progeny had an additional bud on the second day.

104 Genomic DNA and total RNA from pooled cell pellets were prepared for Illumina sequencing in  
105 Johns Hopkins Deep Sequencing and Microarray Core Facility. TruSeq DNA and RNA Library  
106 preparations were used for next generation sequencing in Illumina MiSeq and NextSeq500 75 cycle high-  
107 output run (400M reads), respectively. For RNAseq, each group (two haploid and three aneuploid groups)  
108 had technical triplicates, and an additional haploid strain (parental BY4741) was also used as a reference  
109 genome and a control. Raw reads were checked for read quality using FastQC (v. 0.11.5). Per base  
110 sequence quality (phred > 20) and GC content were consistent across all samples for both DNaseq and  
111 RNAseq.

112 We first performed chromosome copy number analysis in each aneuploid and haploid populations.  
113 The whole genome sequence of *Saccharomyces cerevisiae* strain S288c was obtained from the  
114 *Saccharomyces* Genome Database (SGD). Single-end reads (150bp) were mapped to the reference  
115 genome using the alignment tool Bowtie 2 (v. 2.2.9) and uniquely mapped reads were extracted using

116 SAMtools (v. 1.3.1). Binned reads were median normalized to make counts comparable across samples.  
117 Normalized aneuploid population profiles were then referenced to an associated euploid population  
118 control profile and the ratio was log<sub>2</sub> transformed. R scripts using the circular binary segmentation  
119 algorithm implemented in the Bioconductor package DNACopy (v. 1.48.0), were used to identify copy  
120 number alterations. Next, single-end reads from stranded RNA sequencing were mapped to the annotated  
121 *S. cerevisiae* reference genome using the HISAT2 (v. 2.0.5) aligner. SAMtools was used to sort, index  
122 and convert the .sam file to the required .bam format. Raw counts per gene were generated using HTSeq  
123 (v. 0.6.1p1). Differentially expressed genes in the aneuploid cell populations relative to euploid  
124 populations were identified using the Bioconductor package DESeq2 (v. 1.14.1). Prior to analyses, genes  
125 with average read count less than 5 were filtered out. Data quality was assessed by principal component  
126 analysis (PCA) and distance-based sample clustering. To rule out effects specific to the method of  
127 generation of aneuploid populations, a factor accounting for the different methods was incorporated into  
128 the model design matrix. The contrast factor was solely based on whether a population was euploid or  
129 aneuploid. In other words, this model checked for aneuploidy specific change in gene expression  
130 consistent across all aneuploid populations. The Benjamini-Hochberg corrected p-value was calculated on  
131 the Wald statistic to account for multiple hypothesis testing. Since our data exhibited an enrichment of  
132 low p-values, to control for false positives the obtained result was further corrected for variance  
133 underestimation by applying empirical null modeling. The R package fdrtool (v. 1.2.15) was used to  
134 calculate the false discovery rate (FDR) based on empirical variance of the null distribution. Differentially  
135 expressed genes (CAGE) were defined as genes with a FDR less than 5% (Supplementary Table 1). Gene  
136 sets enriched in the CAGE signature were determined using the GO-Slim Mapper tool (Saccharomyces  
137 Genome Database) followed by hypergeometric tests implemented in R.

138

139 **Transcriptome pattern analysis in aneuploid yeast populations and CIN cancer cell lines**

140 To assess whether there was any transcriptomic similarity between CAGE genes and genes in  
141 response to various environmental stress, we compared the transcriptome result from this study a to  
142 genomic expression response of yeast to stress (ESR) in Gasch et al.<sup>5</sup>. Spearman's rank correlation  
143 coefficient between our dataset and individual stress from Gasch et al. was calculated using pairwise  
144 complete, fold change observations, which covered upwards of 90% of the whole genome. In addition to  
145 a whole genome comparison, the correlation analysis using only the CAGE genes in the aneuploid  
146 population was also performed (Supplementary Table 2). Besides the comparison of the aneuploid  
147 transcriptome to genomic expression patterns from individual stress conditions, ESR genes (857 genes)  
148 were also compared with CAGE genes in Extended Data Figure 2c-d. Lastly, this transcriptomic signature  
149 is not associated with differentially expressed genes associated with ploidy doubling<sup>8</sup>.

150 In parallel, we mined an existing cancer database to investigate differentially expressed genes  
151 correlated with a population harboring heterogeneous aneuploid karyotypes across NCI-60 cancer cell  
152 lines. Similar to Sheltzer (2013)<sup>9</sup>, we used the index of numerical heterogeneity (INH) for each cell line  
153 determined by spectral karyotyping reported by Roschke et al.<sup>10</sup> to characterize the level of chromosomal  
154 instability in each cancer cell lines. Microarray data from 54 of the NCI-60 panel comprising 60 different  
155 cell lines and nine different types of cancers was downloaded from CellMiner<sup>11</sup>. Gene-wise Spearman's  
156 rank correlations between gene expression & INH was used to identify genes whose expression  
157 significantly correlated or anti-correlated with chromosomal instability.

158 Genes with a Benjamini-Hochberg corrected FDR < 5% and absolute value of Spearman's rank  
159 correlation coefficient greater than 0.4 were considered significant and subsequently subjected to a Gene

160 Ontology (GO) analysis. Redundant GO terms were removed by using the simRel (Resnik-Lin) similarity  
161 score (dispensability = 0) implemented in REVIGO<sup>12</sup>.

162

### 163 **Curation and analysis of NCI-60 cancer cell lines**

164 Average ploidy level of each cancer cell line in the NCI-60 panel was calculated from (1) defined  
165 basal ploidy level from spectral karyotyping in Roschke et al.<sup>10</sup> and (2) the proportion of the genome  
166 gained and lost from aCGH analysis based on copy number variations of genomic loci, for each cell line  
167 in Varma et al.<sup>13</sup> (Supplementary Table 7. and CellMiner: <https://discover.nci.nih.gov/cellminer/home.do>)  
168 by the equation below,

169 *Ploidy* =

170 *(Basal ploidy level) \* (1 + Proportion of genome gained – Proportion of genome lost)*

171 Cell volume data was obtained from published single cell size distributions for NCI-60 cancer cell  
172 lines in Dolfi et al. and Zielinski et al.<sup>14,15</sup>. One-tailed Mann Whitney U-test was used to determine  
173 statistically significant difference in cell volume between near diploid (change in ploidy < 5%) and  
174 diploid-distant NCI-60 cell lines. To determine if the trend of cell volume change with ploidy was  
175 independent of tissue type, a generalized linear model (GLM) was fitted to the cell volume data using both  
176 tissue type and absolute ploidy difference from diploid as predictor variables.

177 *Cell Volume = Ploidy Difference from Diploid + Tissue type*

178 A predictor variable was deemed significant if its p-value < 0.05.



179 Published exometabolomics data on the NCI-60 lines was obtained from Zielinski et al.<sup>15</sup>.  
180 Spearman's rank correlation test was used to compute the correlation between CIN level (INH) and uptake  
181 of individual metabolites.

182

## 183 **Microscopy**

### 184 *Fluorescence microscopy*

185 Yeast cells were grown in YPD rich media overnight (14-16 hours) and refreshed in SC complete  
186 media before imaging. FM4-64 pulse-chase experiments were performed in a custom-developed chamber  
187 with the staining conditions described previously<sup>16</sup>. Time-lapse movies were acquired on a Nikon Eclipse  
188 Ti microscope with a Nikon Plan Apo  $\lambda$  60x Oil NA 1.40 objective, equipped with Nikon Perfect Focus  
189 System (PFS) and Nikon NIS Elements AR (v. 4.6) imaging software. Live cell images were acquired  
190 using a Yokogawa CSU-X1 spinning-disk confocal system with 100 $\times$   $\alpha$ Plan Fluor NA 1.46 objective on  
191 a Zeiss Axiovert 200 M microscope -disk confocal system. 488 or 561 nm excitation was used to excite  
192 green (GFP) or red (mCherry) fluorescent signals, respectively, and the emission was collected through a  
193 Hamamatsu C9100-13 EMCCD on the spinning disc systems with MetaMorph acquisition software. All  
194 images with Z series were acquired with a 0.5  $\mu$ m step size and the processing was done using the ImageJ  
195 software (NIH).

196

### 197 *Atomic force microscopy (AFM)*

198 AFM was done on a MFP3D instrument (Asylum Research, USA) using MLCT AUWH  
199 cantilevers (nominal spring constant of 0.01 N/m, Bruker, USA), which was guided under Zeiss Axio

200 Observer Z1 inverted Microscope with 40X objective and positioned at the center of the top surface of  
201 each cell. Indentations were done manually using single force option for multiple measurements per cell  
202 with 25-100 nm of total indentation depth with 1.98  $\mu\text{m/s}$  tip velocity in z. Stable attachment of the tip to  
203 the cell was indicated by a lack of cell movement from the first to the fourth indentation. Prior to each  
204 experiment, the spring constant of the cantilevers was calibrated via the thermal fluctuation method<sup>17</sup>. The  
205 maximum applied force was limited to 1 nN for both yeast and human cell<sup>18,19</sup>.

206 The preparation of aneuploid and euploid cell populations was as described above, and cells were  
207 randomly chosen within these populations. Prior to microscopy, cells at a growth density of OD 0.3 were  
208 gently sonicated to dissociate clumps and then immobilized on 60 mm dishes which were pre-coated by  
209 0.1 mg/ml concanavalin A for at least 20 minutes. For the human cell line Nalm6, cells were immobilized  
210 by the same procedure as described earlier. Data processing was done using Igor Pro software  
211 (Wavemetrics, USA). At least three measurements at cell surface were made in each cell. The Young's  
212 modulus value was calculated using the Hertz model<sup>20</sup>, which describes the indentation into a deformable  
213 elastic half space (cell surface) via relating the applied force (F) to the indentation depth ( $\delta$ ) and the  
214 Young's modulus (E) following the equation below,

215 
$$F = \frac{2E \tan \alpha}{\pi(1-\nu^2)} \delta^2$$

216 where  $\alpha$  is the tip side angle (19.2°) and  $\nu$  is the Poisson's ratio, estimated to be 0.5 for soft biological  
217 materials<sup>21</sup>. Outliers (if any) from Young's modulus calculated from four measurements for each cell were  
218 removed using interquartile range rule (1.5X) to obtain the mean stiffness of each cell, and the mean  
219 stiffness of all tested cells were included in boxplots of Young's modulus. Supplementary Table 8 provides  
220 raw results with mean and standard deviations of Young's modulus for each cell.

221 Because yeast is a walled organism, to separate the stiffness contributed by cell wall vs intra-  
222 cellular turgor, the deflection force-displacement curves were analyzed to compute the slopes at low  
223 indentation and high indentations<sup>18,22</sup>. Arfsten *et al.*<sup>18</sup> suggested that the force against deformation during  
224 initial contact of cantilever and the cell (0-10 nm) was mostly contributed from cell wall stiffness, whereas  
225 the later part of the curve (ranged from 20 to 60 nm, based on the third quartile of the curves that we  
226 obtained) resulted mostly from intracellular turgor. We therefore computed the slopes at the 0-10 nm  
227 portion and the third quartile (Q3) of the curves as the “spring constants” that reflect cell wall stiffness  
228 and turgor, respectively. Slopes were obtained by fitting a linear regression to the raw data at the portion  
229 of 0-10 nm or Q3 of deflection force-indentation curves. Q3 was chosen because the maximal indentation  
230 was different from curve to curve (see examples in Extended Data Fig. 3a) and the third quartile reflected  
231 the fast rising part of all the curves and allowed for a standardized analysis. To facilitate reliable slope  
232 analysis, we determined the noisiness of the curves by performing quadratic fitting of the raw data and  
233 measuring the sum of squared errors (SSE). This resulted in the elimination of one extreme noisy curve  
234 (SSE >1).

235

### 236 *Fluorescence Correlation Spectroscopy (FCS)*

237 FCS measurements were carried out by using the Confocor 3 system (Zeiss) and a 40X, 1.2-NA  
238 C-Apochromat water objective. The Zeiss Zen software calculated the autocorrelation curve from the  
239 fluorescence trace using the standard formula,

$$240 \quad G_{ac}(\tau) = \frac{\langle \delta F(t) \cdot \delta F(t+\tau) \rangle}{\langle F(t) \rangle^2}$$

241 Where

242 
$$\delta F(t) = F(t) - \langle F \rangle$$

243 The system was calibrated by fitting the correlation curve for a 20 nM Rhodamine 6G solution to a  
244 standard free 3-D diffusion model, including a triplet state. The structure parameter (eccentricity of  
245 excitation volume) was fixed at 6 and the upper limit of the triplet state relaxation time was set to 8  $\mu$ s.  
246 The pinhole was set to 1.0 airy unit. Measurements were acquired every 5 seconds with 10 repetitions.

247 For live cell measurements, yeast cells with expressed cytosolic GFP protein fused *BZZ1* promoter  
248 were grown to log phase and immobilized in concanavalin A pretreated glass-bottomed well chambers.  
249 An anomalous diffusion model was used to fit the autocorrelation data<sup>23,24</sup>. Diffusion time per cell ( $\tau_D$ )  
250 was calculated from the autocorrelation curve averaged over five repetitions acquired every five seconds.

251 Diffusion coefficients were calculated using the equation,

252 
$$D_{eff} = \frac{D_{R6G} \cdot \tau_{DR6G}}{\tau_D}$$

253 where  $D_{eff}$  : Diffusion coefficient of the sample,  $D_{R6G}$ : Diffusion coefficient of the Rhodamine 6G  
254 standard,  $\tau_{DR6G}$ : Transit/diffusion time of Rhodamine 6G, and  $\tau_D$ : Diffusion time of the sample.

255

### 256 *Thin-sectioning electron microscopy*

257 For electron microscopy, samples were processed and imaged in the Johns Hopkins University  
258 Integrated Imaging Center. 25 OD600 of cells were spun down and then resuspended in 1 ml of 3%  
259 glutaraldehyde, contained in 0.1 M cacodylate, 5 mM CaCl<sub>2</sub> and 5mM MgCl<sub>2</sub>, pH 7.4 for one hour. After  
260 the cells were briefly washed in ddH<sub>2</sub>O, cells were dispersed and subsequently embedded in agarose (~1:1);  
261 after cooling, the agarose was cut into small pieces (~1 mm<sup>3</sup>). Blocks were post-fixed in 4% KMNO<sub>4</sub>

262 prepared in ddH<sub>2</sub>O for one hour at room temperature and washed by ddH<sub>2</sub>O for four times. Blocks were  
263 then treated with 0.5% sodium meta-periodate for 15 minutes at room temperature (to aid in infiltration)  
264 and washed once with 50 mM KPO<sub>4</sub> (pH 7.4), and resuspended in 50 mM ammonium phosphate (pH 7.4)  
265 for 15 minutes. After washing the blocks twice in ddH<sub>2</sub>O, blocks were placed into filtered 2% uranyl  
266 acetate (pH 4.5) and protected from light for overnight. On the second day, blocks were dehydrated  
267 through a graded series of ethanol (50-100% at 40°C) and then left overnight in 100 % ethanol. Subsequent  
268 three 15-minute washes in ethanol followed by two washes with propylene oxide (PO) were performed  
269 before placing the blocks into a 50:50 mixture of PO and Spurr resin. Samples are placed on a  
270 rocker/rotator for eight to twelve hours, and subsequently incubated overnight under vacuum to allow the  
271 PO to evaporate. On the third day, samples were given two changes of resin over six to eight hours and  
272 left overnight in a third change, followed by incubation in the vacuum through the day. Next, the samples  
273 were placed in beam capsules containing fresh Spurr resin and incubated in the oven at 60-80°C for 24-  
274 48 hours. Finally, 80 nm sections were cut, collected onto 400 mesh copper, high-transmission grids, and  
275 post-stained with lead citrate (two-five minutes). Grids were examined on a FEI Tecnai 12 transmission  
276 electron microscope operating at 100 keV. Images were collected with an Olympus Soft Imaging System  
277 Megaview III side-entry camera; and figures were assembled in Photoshop with only linear changes in  
278 brightness and contrast. For the quantification of cell wall thickness, four measurements were made at  
279 different locations in each cell using ImageJ, and the quantified locations were determined by the cell wall  
280 portion of two diagonal lines randomly drawn through the cell. All the quantified cell images were shown  
281 in Extended Data Fig. 5.

282

283 **Zymolyase sensitivity assay**

284 Yeast cells were cultured as described above and treated with 50 µg/mL of Zymolyase 100T in 10  
285 mM Tris-HCl (pH 7.5). Cell lysis was monitored every 15 minutes at OD 660 at 30°C. To track cell wall  
286 degradation under zymolyase treatment, cells were treated with 20 µg/mL of Zymolyase 100T in 10 mM  
287 Tris-HCl (pH 7.5). Prior to zymolyase treatment, yeast cell wall was stained with 50 µg/mL  
288 CF®488A concanavalin A (Biotium, 29016) for 20 minutes at 30°C and washed with 10 mM Tris-HCl  
289 (pH 7.5). After 20 minutes of zymolyase digestion, both haploid and aneuploid cells were imaged under  
290 microscopy.

291

## 292 **Glycerol concentration measurements**

293 Extracellular glycerol was measured enzymatically using a commercial glycerol assay kit (Sigma  
294 Aldrich). Cells were freshly prepared as described earlier. The supernatant of the culture was collected,  
295 and glycerol determinations were performed as per manufacturer's specifications.

296

## 297 **Immunoblotting**

298 Cells were cultured as described above, and total protein lysates were generated using TCA  
299 (trichloroacetic acid) precipitation. Western blots were conducted using NuPAGE 4–12% Bis-Tris protein  
300 gels (Invitrogen) for sample resolution and transferred to PVDF membrane (Invitrogen, iBlot 2). Phospho-  
301 p44/42 MAPK (Thr202/Tyr204) antibody (Cell Signaling Technology, #9101), Mpk1 antibody (Santa  
302 Cruz Biotechnology, E-9) were used to detect yeast phosphorylated and total Slt2 proteins with a loading  
303 control Pgk1 (Pgk1 antibody, Thermo Fisher Scientific, 22C5D8). Signals were detected using a LI-COR  
304 Odyssey blot scanner (LI-COR Biosciences), and signal intensity was quantified using ImageJ. Results  
305 were reproduced from two experiments using independently generated cell populations. Images were

306 cropped for data representation using ImageJ without further adjustments from scanned images, and  
307 uncropped images were included in Supplementary Figure 1.

308

### 309 **Amino acids analysis**

310 Yeast cells were cultured as described above, and samples with 25 OD600 cell density were  
311 collected in triplicate. Then the cell pellets were resuspended in 500  $\mu$ l of PBS with zirconium oxide beads  
312 and lysed by continuous vortexing for 15 minutes. Cell lysates were centrifuged at 16,000 xg, and proteins  
313 in the supernatant were precipitated by adding sulfosalicylic acid to a final concentration of 3.2% with  
314 five minutes of incubation at room temperature. Two rounds of centrifugation were then performed for  
315 three minutes at 16,000 xg to collect soluble amino acids. Concentrations of amino acids were determined  
316 by ion exchange chromatography procedures using a Biochrom 30 amino acid analyzer at the Kennedy  
317 Krieger Institute Biochemical Genetics Laboratory.

318

### 319 **Measurement of Glucose uptake**

320 Yeast cells were cultured as described above, but the populations were grown in synthetic complete  
321 media with 2% raffinose media for four hours. Then cells were transferred back to SC complete media  
322 with 60  $\mu$ M of 2-NBDG for 5, 15, 30 and 60 minutes, respectively. Before imaging, cells were washed  
323 thrice with PBS (pH 7.4). The quantification of 2-NBDG fluorescent intensity was performed using  
324 ImageJ.

325

### 326 **Mammalian cell culture and generation of aneuploidy in human cell lines**

327 Human Nalm6 cells (ATCC CRL-3273, a human pre-B ALL cell line, a gift from M. Tyler lab  
328 and was tested with no mycoplasma contamination) were cultured in RPMI 1640 medium supplemented  
329 with 10% (v/v) fetal bovine serum (FBS). Following subculture of  $10^5$  Nalm6 cells in six well plates, cells  
330 underwent treatment with a final concentration of 1  $\mu$ M MPS1-inhibitor NMS-P715<sup>25</sup> (Calbiochem,  
331 475949). After 24 hours of drug treatment, media with MPS1 inhibitor was removed and cells were grown  
332 in drug-free media for another 40 hours before following functional assays.

333 Chromosome spreads were performed using a modified protocol described previously<sup>26</sup>. Cells  
334 were arrested in mitosis in Karyomax Colcemid solution (100 ng/ml; Life Technologies) for four hours  
335 following which cells were collected by centrifugation for five minutes at 1000 rpm and gently  
336 resuspended in 200  $\mu$ l of PBS. Six ml of 0.56% KCl solution pre-warmed to 37°C was used to swell cells  
337 for seven minutes. Cells were prefixed by freshly prepared fixative solution of methanol:acetic acid (3:1)  
338 (20  $\mu$ l per ml of total volume); then cells were collected by centrifugation and fixed in 9.5 ml of fixative  
339 solution before storing at 4°C. Spreads were dropped onto moisturized glass slides, air dried for ~30 min  
340 and baked for 10-15 min at 65°C. Slides were treated for 45 min with RNase and Propidium iodide (pre-  
341 warmed to 37°C) and mounted in Vectashield (Vector Laboratories, Burlingame, CA) containing DAPI.  
342 Chromosome spreads were imaged on a Nikon Eclipse Ti widefield-fluorescence microscope with a Nikon  
343 Plan Apo  $\lambda$  60x Oil NA 1.40 objective. Spreads were counted using the Cell Counter plug-in in ImageJ  
344 (National Institutes of Health, Bethesda, MD).

345

#### 346 **Transferrin Uptake assay**

347 The transferrin uptake assay (Alexa Fluor 488 conjugated transferrin, Thermo Fisher Scientific,  
348 T13342) experimental procedures were modified according to manufacturer's instruction. Diploid and



349 aneuploid cell populations were placed on ice for five minutes and then washed by ice-cold live cell  
350 imaging solution (Thermo Fisher Scientific, A14291DJ) containing 1% BSA and 20 mM glucose. Then,  
351 1 uM of Alexa Fluor 488 conjugated transferrin was added and incubated for 15-20 minutes at 37°C. Later,  
352 cells were washed with live cell imaging solution and analyzed in an Attune NxT Flow Cytometer. The  
353 three experiments in Fig. 2f were performed independently from three independent diploid and aneuploid  
354 populations. Events were gated on Alexa Fluor 488 positive signals consistently in all three experiments.

355

### 356 **Density gradient separation of cells**

357 Haploid and aneuploid populations were prepared as described earlier and a total cell number equal  
358 to 10 OD<sub>600</sub> was harvested for centrifugation. Percoll density gradients were prepared by diluting Percoll  
359 (GE Healthcare) with 1.5 M NaCl for a final NaCl concentration of 167 mM. Cells were resuspended in  
360 1 ml Tris buffer and then overlaid onto 10 ml of Percoll solution in 15 ml Corex tubes and centrifuged  
361 at 19240 x g for 15 min at 20 °C. An additional 20 min of centrifugation at 20 °C was performed to separate  
362 cell populations. Quantification of density distributions was performed in ImageJ.

363

### 364 **Genome-wide ORF deletion screen on heterogeneous aneuploid populations**

365 1. Construction of yeast triploid ORF deletion collection (Step 1 to 3 in Extended Data Fig. 9)

366 First, plasmids pRS315-*STE2pr-spHIS5* (RLB967) and pGAL-HO (RLB478) were transformed  
367 into the haploid *MATa* and *MATa* ORF deletion collections, respectively, based on a modified high-  
368 throughput yeast transformation protocol<sup>27</sup>. A diploid homozygous ORF deletion collection (*MATa/a*) was  
369 then made by mating the transformed collections with selectable auxotrophic marker *LEU2* on pRS315-

370 *STE2pr-spHIS5* and *URA3* on pGAL-HO, on YPD plates overnight following by auxotrophic selection on  
371 SD-LEU-URA plates. Then all the diploid strains were cultured in 200  $\mu$ l of SD-LEU-URA broth media  
372 overnight and sub-cultured again on SD-LEU-URA plates, repeatedly to ensure no contamination from  
373 non-dividing haploid cells. Next, we cultured this *MATa/a* diploid ORF deletion collection in SD-LEU-  
374 URA media with 2% raffinose media overnight and added galactose (1%, final concentration) to switch  
375 mating type to *MATa/a*. After five hours of HO induction, galactose-containing media was removed, and  
376 cells were sub-cultured in SD-LEU-HIS media overnight and then pinned on SD-LEU-HIS plates to  
377 selectively grow *MATa/a* cells. Before proceeding to the mating step of haploid and diploid deletion  
378 collection, both diploid *MATa/a* and *MATa/a* ORF deletion collections were grown in YPD rich media in  
379 1:100 dilution ratio for two constitutive passages (cells from each passage grew for 22 hours). Then the  
380 collections were sub-cultured in SD-LEU+5-FOA media (5-Fluoroorotic Acid, 0.5 mg/mL) in order to  
381 lose pGAL-HO (*URA3*) plasmid for two subsequent passages with 1:100 dilution, and later we manually  
382 picked colonies up from each mutant strain on SD-LEU+5-FOA plates to ensure the cells have lost pGAL-  
383 HO plasmid. In parallel, to proceed the subsequent round of mating, we next replaced *KanMX* cassette in  
384 *MATa* haploid ORF deletion collection to *URA3MX*. Then the modified *MATa* ORF deletion collection  
385 with *URA3MX* marker and *MATa/a* ORF deletion collection with pRS315-*STE2pr-spHIS5* were mated on  
386 YPD plates overnight and then selectively grew on SD-LEU-URA plates. Again, the triploid ORF deletion  
387 collection was cultured in 200  $\mu$ l of SD-LEU-URA broth media overnight and sub-cultured again on SD-  
388 LEU-URA plates, repeatedly to ensure no contaminations from non-dividing haploid and diploid cells. At  
389 the end, the we grew triploid ORF deletion collection on SD-LEU+G418 plate, contains homozygous  
390 ORF deletions, where two ORF deletion alleles with *KanMX* and one with *URA3MX*. In each triploid  
391 strain, plasmid pRS315-*STE2pr-spHIS5* was used for later *MATa* selection, and the chromosomal

392 *URA3MX* allele was used as a negative selection in media containing 5-FOA (0.4 mg/ml) to inhibit euploid  
393 (triploid) cell growth when growing triploid-derived aneuploid populations.

394

395 2. Generate yeast aneuploid and haploid ORF deletion collections (Step 4 in Extended Data Fig. 9)

396 In our previous work, we induced yeast meiosis in wild type (WT) triploid cells, following by  
397 tetrad dissections to generate aneuploid progeny. With the yeast triploid ORF deletion collection, we grew  
398 triploid cells in 200  $\mu$ l of SD-LEU+G418 media at 23°C overnight and added another 200  $\mu$ l of SD-  
399 LEU+G418 media to grow for another 14 hours. Later, cells were washed twice by ddH<sub>2</sub>O and once by  
400 sporulation media to remove nutrients from the culture, and then cells were resuspended in 400  $\mu$ l of  
401 sporulation media with final OD<sub>600</sub> = 1 in 96 well deep-well (2 ml) plates. The sporulated cultures were  
402 incubated on plate shakers at 23°C for five days before re-growing in defined rich media. The same  
403 protocol was applied to induce meiosis of the diploid *MATa/a* ORF deletion collection with pRS315-  
404 *STEpr-spHIS5* at the same time for later growth comparison.

405

406 3. Monitor the growth of aneuploid and haploid ORF deletion collections (Step 5 in Extended Data Fig.  
407 9)

408 In order to examine the effects of ORF deletion specific to aneuploid growth, we measured the  
409 growth of three independent groups: aneuploid populations harboring a homozygous gene mutation  
410 derived from the triploid ORF deletion collection, haploid ORF deletion collection derived from the  
411 diploid *MATa/a* ORF deletion collection, and the parental haploid ORF deletion collection. After five days  
412 of sporulation, sporulated cultures from the triploid and diploid ORF deletion collections were diluted by  
413 five-fold (OD = 0.2), and then 4  $\mu$ l of each diluted sporulation culture was inoculated into the 200  $\mu$ l of

414 SD-LEU-HIS+G418 broth culture and spotted on SD-LEU-HIS+G418+5-FOA agar plates in 96 well  
415 format, respectively, to grow at 23°C. In parallel, the parental haploid ORF deletion collection was  
416 cultured in SD-LEU+G418 media overnight and normalized to OD = 0.2 on the second day; 4 µl of  
417 normalized culture was spotted on SD-LEU+G148 solid agar plates as a growth reference to other two  
418 collections. Readings of OD600 from the broth culture, representing cell number, were measured every  
419 14 and 10 hours for 144 hours continuously. In parallel, the growth of aneuploids and haploids on solid  
420 agar plates were measured by colony/spot intensity from the plate images scanned by HP ScanJet G4050  
421 every day at the same time. The scanned images were later analyzed by a modified ImageJ plugin with  
422 batch analysis in R using customized scripts and packages. Both OD reading and spot intensity  
423 measurements over time resulted in growth curves of the aneuploid and haploid growth.

424

#### 425 4. Analyses of growth capacity from the primary genome-wide screen.

426 Two independent growth conditions required two different analysis pipelines. Firstly, the scanned  
427 96-well format plate images were aligned by ImageJ with each other through all the time points for the  
428 quantitative batch analyses. Many deletion strains from strain constructions in a high-throughput format  
429 may be lost due to both technical or biological reasons. Thus, we excluded those positions on each 96 well  
430 plate with no visualized cell growth from all engineered haploid and diploid collections and only  
431 quantified strains actually growing during the screen. Then, we used an automated image analysis tool,  
432 Colonyzer (Python version 2.7.2) to analyze cell population growth based on cell density, represented by  
433 the intensity (or brightness) of each spot from the batch analysis of all the 96 well plate images<sup>28</sup>. To  
434 compare the growth capacity qualitatively from the quantitative image analysis between strains, we  
435 measured area under the curve (AUC) of the growth curve by the trapezoidal rule from each deletion strain  
436 as a growth parameter. Before examining the growth of mutant aneuploid cell populations, we first

437 analyzed the growth of two haploid ORF deletion collections in order to exclude those mutants causing  
438 meiotic and germination defects. AUC of each strain between the parental haploid and diploids-derived  
439 haploid ORF deletion collections was compared. If the gene deletion exhibits meiotic or germination  
440 defects, the diploids-derived haploid cells from meiosis induction cannot grow (or low AUC value), but  
441 the parental haploid strain still can. Additionally, gene deletions may exhibit exaggerated growth defects  
442 or accumulate additional mutations during multiple steps of strain constructions in a high-throughput  
443 format. To ensure our screen result could reflect the effect of the ORF deletion on aneuploid growth, both  
444 haploid collections (before and after engineered) should exhibit similar growth capacity. We were able to  
445 remove these unexpected outliers or unwanted mutations causing meiotic or germination defects from a  
446 correlation clustering analysis (Supplementary Method Fig. 1a). Density-based clustering analysis  
447 between AUC of two haploid collections identified the main clustered populations of two collections for  
448 the following analyses. The ORF deletion strains passing this control process in diploid-derived haploid  
449 and triploid-derived aneuploid ORF deletion collections were then analyzed for their growth capacity in  
450 both broth culture and agar plate conditions, respectively. In addition, we expected that the growth of  
451 aneuploid cells should be defective and their take-off time should be at least one cell cycle delay from  
452 haploid cells while we aimed to screen mutations abolishing aneuploid cell growth.

453 To identify gene deletions specifically affecting aneuploid growth, but not euploid growth, the  
454 ratio of AUC between aneuploid and haploid growth was used to identify gene candidates. In other words,  
455 we looked for the largest growth difference between aneuploid and haploid cells, when a mutation presents.  
456 Moreover, we considered two independent growth conditions as biological replicates, and thus we looked  
457 for common quantitative results from both datasets. Firstly, we assessed the correlations between two  
458 datasets by Spearman's rank correlation and observed high correlation (Spearman's rank correlation =  
459 0.701, p-value < 2.2E-16), indicating the high-throughput screen was reproducible and consistent in

460 different growth conditions. Secondly, we selected gene candidates exhibiting poor growth (lowest 25%  
461 of the AUC ratio distribution) commonly in both growth conditions for the secondary screen  
462 (Supplementary Method Fig. 1b). Outlier candidates that grew poorly on agar plate or in broth culture  
463 may be excluded in this criterion, while we aimed to look for the gene deletion candidate affecting  
464 aneuploid cell growth consistently in different growth environments. Many genes candidates from the  
465 lowest quartile of AUC ratio are involved in the same biological processes, and GO analysis on biological  
466 process revealed enriched terms such as “response to osmotic stress”. The subsequent rounds of hits  
467 validation narrowed down the gene deletion displaying the most global repressive effects on aneuploid  
468 growth.

469

470 5. Screen validations to identify genes whose deletion consistently impair the growth and viability of  
471 heterogeneous aneuploids

472 To identify a gene deletion globally abolishing aneuploid cell growth, we scaled the population  
473 size up to two-fold with three replicates to ensure that aneuploid cells (total six times of the population  
474 size in the primary screen) with the gene deletion all grew poorly. Thus, this round of the screen validation  
475 aimed to eliminate those gene deletions possibly rescued by specific karyotypes. Strains from the lowest  
476 quartile of AUC ratio of both growth condition were cherry-picked (382 strains); in parallel, strains were  
477 selected randomly from the entire collection for comparison (469 strains). Both diploid-derived haploid  
478 and triploid-derived mutant aneuploid strains grew in broth media with the same condition as the primary  
479 screen, but additional time points were taken to improve the accuracy of growth measurements (daily  
480 measurements with 14, 5 and 5-hour intervals). Again, we used AUC ratio between haploid and aneuploid  
481 growth as a proxy to determine the effect of the ORF deletion to aneuploidy. To determine the gene  
482 candidates and to proceed to the next round of experimental validation, we applied a stringent threshold

483 to the secondary screen by finding outliers, representing gene candidates with significantly low (or high)  
484 AUC in this random group, from the AUC distribution of the randomly-selected group by medcouple-  
485 adjusted Tukey boxplot for outlier detection<sup>29</sup>. We were able to determine the upper threshold on the AUC  
486 ratio for a gene candidate as 0.2866612 while the average WT aneuploidy-haploid group had AUC ratio  
487 of 0.31518. 36 gene deletions were identified. In Supplementary Method Figure 1c, we provide examples  
488 for three mutants related to cell wall integrity (CWI) pathway that were among the hits in the primary  
489 screens but were eliminated in the secondary screen with larger population size.

490         Next, we performed conventional tetrad dissection to analyze the growth of mutant aneuploid  
491 progeny in YPD rich media in order to manually examine growth capacity without any growth bias from  
492 auxotrophic selection or high-throughput format. Few candidates exhibited low sporulation efficiency,  
493 and thus we excluded them before we analyzed the final 20 gene deletion candidates in tetrad analysis.  
494 Next, two criteria, colony viability and size of aneuploid progeny, were considered to identify the final  
495 candidates. While we looked for a mutation specifically repressing aneuploid growth, a successful gene  
496 deletion candidate should have none of the mutant aneuploid colonies growing bigger than haploid  
497 colonies. 12 of 20 analyzed gene deletion candidates passed this criterion showing a universal repressive  
498 growth phenotype (24 aneuploid progeny were monitored) (Supplementary Table 5). Later six of those  
499 gene deletion candidates with an annotated phenotype in *Saccharomyces* Genome Database (SGD) passed  
500 another round of tetrad dissection analysis (64 aneuploid progeny of each mutant were monitored).  
501 Additionally, the viability of mutant aneuploid progeny should be lower than WT aneuploid progeny, as  
502 judged by the number of visible colonies from triploid meiosis. In the end, three gene candidates (*art1Δ*,  
503 *vps51Δ* and *yps5Δ*) were identified.

504

505 6. Micro-colony assay to assess growth rate

506 To complement the low-throughput nature of the manual tetrad dissection method validating aneuploid  
507 growth and to obtain a real-time growth rate of single aneuploid traits with diverse genetic background,  
508 we used a microscopy-based micro-colony assay to monitor hundreds of single cell growth<sup>30</sup>. Of note,  
509 while we have selected gene candidates based on viability as one of the primary filters, in this assay, we  
510 aimed to measure the growth rate of viable cells only. Thus, only budded cells were selected to be  
511 imaged. In the micro-colony assay, the growth rate was calculated according to the area expansion with  
512 time. While yeast cells could start piling up vertically in addition to the horizontal expansion after  
513 generations of growth, we imaged NLS-mCherry haploid cells to test the length of time of colony area  
514 expansion proportionally increasing with nuclear divisions (Supplementary Method Fig. 1d). As  
515 observed, we were able to have consistent growth rate measurements, represented by colony area  
516 expansion for at least 10-12 hours of growth, compared to nuclear divisions. Then, hundreds of  
517 aneuploid colonies as well as haploids were randomly inoculated into YPD rich media in 96 well plates  
518 overnight (14-16 hours). At least 90 aneuploid colonies from each gene deletion candidate were  
519 analyzed for each experiment. On the second day, cells were refreshed in SC complete media for 2-3  
520 hours and then diluted to roughly  $10^4$ - $10^5$  cells per ml for subsequent imaging. Glass-bottomed 96 well  
521 plates were coated with 100  $\mu$ l of 100  $\mu$ g/ml concanavalin A and then washed once with 200  $\mu$ l of water  
522 and once with 200  $\mu$ l of SC complete media. 100  $\mu$ l of cells (total  $10^3$ - $10^4$  cells) from each culture was  
523 inoculated and incubated at the room temperature for 30 min to 1 hour and then spun at 360 g for 2 min  
524 for immobilization. Before placing the plate on the microscope, the media was gently removed, and 200  
525  $\mu$ l of SC complete media was added to remove floating cells. Cells were imaged at 25°C in an  
526 environmental chamber every hour for 12-16 hours with Nikon Plan Apo  $\lambda$  40x NA 0.9 air objective on  
527 a Nikon Eclipse Ti microscope equipped with Nikon Perfect Focus System (PFS). Because of the high



528 karyotypic diversity in each aneuploid colony (only 10% of aneuploid karyotypes are stable), at least  
529 three windows, containing multiple cells in each window, were imaged from each well (colony). After  
530 collecting all the images, the area of micro-colonies was measured in a batch analysis pipeline  
531 customized in Nikon NIS Elements AR software. While growing micro-colonies may merge with each  
532 other in the later time points, only those micro-colonies growing separately for at least eight hours with  
533 exponential area expansion ( $R^2 > 0.90$  in log2 micro-colony area size) were analyzed for their growth  
534 rate.

535

## 536 **Statistical analysis and reproducibility**

537 No statistical methods were used to predetermine sample size. The experiments were not  
538 randomized, and the investigators were not blinded to allocation during experiments and outcome  
539 assessment. Statistical methods and details were specified in figure legends or corresponding Method  
540 sections, and the analyses were performed in the R environment (<https://www.r-project.org>) using  
541 standard packages and custom scripts. For the boxplots in the figures, black circle and centre bars indicate  
542 mean and median of the population, respectively. The upper and lower hinges represent the third and the  
543 first quartiles; the whiskers show a 1.5x interquartile range. For the violin plot, the shaded area represents  
544 the data as a continuous distribution the same as a boxplot. Sample sizes or numbers of independent  
545 experiments are indicated in figure legends or in Source data. Significance levels were indicated,  
546 respectively, by n.s. for p-value  $> 0.05$  (no significance), \* for p-value  $< 0.05$ , \*\* for p-value  $< 0.005$ , \*\*\*  
547 for p-value  $< 0.0001$ ); exact p-values are documented in figure legends or Source data.

548

## 549 **2. Mathematical and biophysical models**

## 550 **Statistical model for assessment of aneuploid population size**

### 551 1. Model assumptions

552 The karyotypic state of individual strains of the aneuploid population were assumed to be  
553 independent of each other. In addition, within a strain, copy number change of one chromosome is not  
554 presumed to influence copy number variation in other chromosomes. Copy number states within a strain  
555 are restricted to either one or two.

### 556 2. Mathematical design

557 Each strain follows a random binomial distribution with either 1 or 2 copies of individual  
558 chromosomes.

$$559 Y \sim B(n = 16, p) \quad 1/16 \leq p \leq 1$$

560 where,  $n = 16$  is the number of chromosomes, and probability  $p$  of copy number alteration is a random  
561 variate.

562 Relative chromosome copy number (RCC) in a strain  $k$  was defined as a ratio of the copy number of  
563 chromosome  $x$  ( $x$  can be one of Chr1 to Chr16) in the strain to the average copy number of other  
564 chromosomes in the same strain.

$$565 F_k = \frac{Y_{(k,x)}}{\sum_m Y_{(k,m)}}, \quad \forall m = \{1, 2, \dots, x-1, x+1, \dots, 16\}$$

566 where  $Y_{(k,m)}$  is the copy number of chromosome  $m$  in strain  $k$ .

567 Mean and standard deviation (SD) of RCC as a function of population size  $s$  were calculated as follows:

$$568 \bar{F}_s = \frac{\sum_{k=1}^s F_k}{s}$$

569

$$\sigma_s = \sqrt{\frac{\sum_{k=1}^s (F_k - \bar{F}_s)^2}{s}}$$

570 The population size below which the absolute value of the first order derivative of the 95% confidence  
571 interval (CI) for RCC mean as well as SD was below  $10^{-5}$ , was estimated as a reasonable minimum  
572 population size  $s_{critical}$  (Supplementary Method Fig. 2).

573

$$s_{critical} = \arg \min_s \left( \left| \frac{\partial(CI(\bar{F}_s))}{\partial s} \right| - 10^{-5} \right)$$

574 To confirm an approximate range for the population size, multiple iterations of the entire workflow were  
575 performed. The entire pipeline was implemented in R (v. 3.3.2).

576

## 577 **Biophysical model for hypo-osmotic stress in aneuploidy**

### 578 1. Introduction

579 Our model examining the effect of proteome imbalance on the intracellular osmotic pressure starts  
580 with a simple biological consideration. Many proteins in the cell accomplish their biological functions by  
581 assembling into protein complexes. In the euploid state, complex components are expressed at levels that  
582 lead to a relatively balanced amount of proteins that assemble into the same complexes (Supplementary  
583 Method Fig. 3a and 3d). Due to its dosage effect on part of but not the whole genome, aneuploidy causes  
584 a proteome imbalance, which disrupts the stoichiometry balance of many protein complexes, leading to  
585 an increase in the number of unbound proteins (Supplementary Method Fig. 3b and 3e)<sup>1,31</sup>. These  
586 additional free proteins in the cytoplasm, for thermodynamic reasons, lead to a decrease in chemical  
587 potential of cytoplasmic water. This leads to an inflow of water into the cytoplasm, increased turgor

588 pressure on the plasma membrane, and an increase in cell volume (Supplementary Method Fig. 3e). Upon  
589 full duplication of the genome and return to the next euploid state, the complex component balance is  
590 restored. This leads to a drop in total concentration of free molecules compared to aneuploids and thus to  
591 a drop in both the volume of water flowing into the cytoplasm and the turgor pressure (Supplementary  
592 Method Fig. 3c and 3f).

## 593 2. Physical model (Mathematical description)

594 We model the osmotic behavior of a cell based on the fundamental principles of thermodynamics  
595 of chemical solutions. The osmotic pressure is due to the balancing of chemical potential of water. The  
596 chemical potential (or chemical activity) of a component of a solution is a thermodynamic parameter  
597 characterizing the change in Gibbs free energy upon addition or subtraction of the atoms in a species in a  
598 chemical solution. It is generally denoted as  $\mu_{component}$  and is described by the following equation:

$$599 \quad \mu_i = \left( \frac{\partial G}{\partial N_i} \right)_{T,P,N_{j \neq i}}$$

600 Where  $i, j$  are components,  $N_i$  denotes the number of molecules,  $T$  and  $P$  are temperature and pressure  
601 respectively and  $G$  is Gibbs free energy of the whole system.

602 Assuming a constant temperature and pressure, such as for instance in aqueous solutions, the advancement  
603 of a chemical reaction and hence its equilibrium can be parameterized from the chemical potentials of its  
604 components straightforwardly:

$$605 \quad \left( \frac{dG}{d\xi} \right)_{T,P} = \sum_i \mu_i \nu_i = \Delta_r G_{T,P}$$

606 The  $\Delta_r G_{T,P}$  Gibbs free energy change for the reaction and is deciding whether the reaction is advancing  
607 ( $\Delta_r G_{T,P} < 0$ ), at equilibrium ( $\Delta_r G_{T,P} = 0$ ) or is reversing ( $\Delta_r G_{T,P} > 0$ ).

608 In ideal solutions,

609 
$$\mu_i = \mu_i^0(T, P) + RT \ln(x_i)$$

610 Where  $x_i$  is the concentration of the reagent  $i$ , which at equilibrium leads us to the following formulation:

611 
$$\sum_i \mu_i \nu_i = \Delta_r G_{T,P} = 0$$

612 Or

613 
$$\prod_i x_i^{\nu_i} = e^{-\sum_i \nu_i \mu_i^0(T,P)/RT}$$

614 Which, if we substitute the right side of the equation as  $k_{eq} = e^{-\sum_i \nu_i \mu_i^0(T,P)/RT}$ , is the widely known mass  
615 action law commonly used in chemistry.

616 In our case, we focus on the reaction of water transfer across the cell membrane:

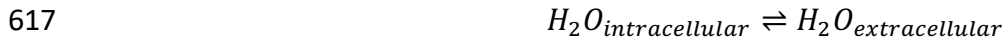

618 Due to the presence of a higher concentration of solutes inside the cell compared to outside the cell, the  
619 chemical activity of water is not the same. If the cell membrane was completely permeable to the water,  
620 the extracellular water would flow into the cell, generating osmotic pressure ( $\pi$ ) consistent with the general  
621 equations used to derive osmotic pressure in ideal solutions.

622 
$$\mu_{H_2O}^{intracellular}(T, P + \pi) - RT \ln([H_2O]_{intracellular}) - \int_P^{P+\pi} V_m dp = \mu_{H_2O}^{extracellular}(T, P) -$$
  
623 
$$RT \ln([H_2O]_{extracellular})$$

624

625 Once balanced at equilibrium ( $\mu_{H_2O}^{intracellular} = \mu_{H_2O}^{extracellular}$ ), it gives us:

626 
$$-RT \ln([H_2O]_{intracellular}) + RT \ln([H_2O]_{extracellular}) = \int_P^{P+\pi} V_m dp$$

627 Or, with integration:

628 
$$-RT \ln\left(\frac{[H_2O]_{intracellular}}{[H_2O]_{extracellular}}\right) = V_m \pi \Rightarrow \pi = -\frac{RT}{V_m} \ln\left(\frac{[H_2O]_{intracellular}}{[H_2O]_{extracellular}}\right)$$

629 The plasma membrane separates the cytoplasm from the extracellular environment and creates a baseline  
 630 chemical potential difference between the two compartments<sup>32</sup>, which we will consider as constant and  
 631 denote it as  $\Delta\mu_{H_2O}^{membrane}$ .

632 Re-writing the equation above, this leads to the first equilibrium equation for water chemical potential:

633 
$$\mu_{H_2O}^{extracellular} - RT \ln([H_2O]_{intracellular}) - \int_P^{P+\pi} V_m dp$$

634 
$$= \mu_{H_2O}^{intracellular} + \Delta\mu_{H_2O}^{membrane} - RT \ln([H_2O]_{extracellular})$$

635 By denoting  $\Delta\mu_{H_2O}^{membrane} = -RT \ln([H_2O]_{membrane}^{drop})$  with  $\Delta\mu_{H_2O}^{membrane}$ , we arrive at

636 
$$\pi = -\frac{RT}{V_m} \ln\left(\frac{[H_2O]_{intracellular}}{[H_2O]_{extracellular} [H_2O]_{membrane}^{drop}}\right)$$

637 Where  $[H_2O]_{membrane}^{drop}$  is a constant, since  $\Delta\mu_{H_2O}^{membrane}$  is a constant, and  $[H_2O]_{extracellular}$  can be  
 638 considered as a constant. Hence, by denoting  $[H_2O]_{extracellular} [H_2O]_{membrane}^{drop} = [H_2O]_{base}$

639 
$$\pi = -\frac{RT}{V_m} \ln\left(\frac{[H_2O]_{intracellular}}{[H_2O]_{base}}\right)$$

640 Assuming that an excessive turgor pressure would rupture the cell wall and disrupt biochemical reaction  
 641 equilibria, there is a minimum value for intracellular water concentration, corresponding to:

642 
$$\pi_{max} = -\frac{RT}{V_m} \ln\left(\frac{[H_2O]_{intracellular}^{min}}{[H_2O]_{base}}\right)$$

643 We now denote the pressure of water in euploid or aneuploids as

644 
$$[H_2O]_{intracellular} = \alpha [H_2O]_{base}$$

645 Where  $\alpha$  is a water abundance factor such that

646 
$$\pi = -\frac{RT}{V_m} \ln(\alpha)$$

647 And

648 
$$1 > \alpha > \frac{[H_2O]_{intracellular}^{min}}{[H_2O]_{base}}$$

649 Based on prior work, because osmotic regulation depends on concentration differences, the total amount  
650 of osmolytes is proportional to the total amount of proteins and complexes inside the cell, leading to the  
651 correlation between the total amount of water and protein/complex inside the cell at a fixed  $\alpha$ <sup>32</sup>.

652 Assuming that the water is the dominant component of the cell, this means that the volume of the cell  $V_{cell}$   
653 is proportional to the total amount of the proteins  $N_o$  in the cytoplasm times the water abundance factor

654

655 
$$V_{cell} \propto N_o \alpha$$

656 Where  $\propto$  denotes linear proportionality.

657 It is well documented that aneuploidization leads to concentration changes of hundreds to thousands of  
658 protein molecules in the cells compared to parental euploid cells<sup>1,31</sup>. This suggests the linear

659 proportionality relationship between the total number of biomolecular entities ( $N_o$ ) and the number of  
660 protein complexes and unbound proteins:

$$661 \quad N_o \propto \text{Total number of free proteins} + \text{Total number of complexes.}$$

662 To simplify the computation, we assume that every protein participates in a single complex, which leads  
663 to the equation below:

$$664 \quad N_o \propto \sum \text{Total number of proteins} - \sum \text{Number of complexes} * \text{Size of complexes}$$

665 Also to simplify the computation, we assume that every complex assembles fully. This means that each  
666 complex's concentration is equal to the concentration of its least abundant component.

667 If we denote  $S_j$ , the set of proteins forming a complex,  $N_{\text{protein } k}$  the total amount of protein  $k$ , we can write  
668 the above relationship as:

$$669 \quad N_o \propto \sum N_{\text{protein}} - \sum_j \min_{k \in S_j} (N_{\text{protein}_k}) * |S_j|$$

670 Our final assumption to simplify the simulation is that the amount of a protein in the cytoplasm is doubled  
671 upon duplication of the gene coding for it. This assumption is consistent with prior experimental findings  
672 for most of proteins<sup>1,31</sup>, despite the existence of stronger or weaker dosage effects for some specific  
673 proteins.

674 If we denote  $A_k$  - the abundance of the protein  $k$  and  $P_k$  in  $[1, 2]$ , reflecting whether the gene coding for  
675 the protein has been duplicated due to the aneuploidy or not, and by substituting  $N_{\text{protein } k} = A_k * P_k$  in the  
676 formula above, obtain this equation:

$$677 \quad N_o \propto \sum_i A_i * P_i - \sum_j \min_{k \in S_j} (A_k * P_k) * |S_j|$$



678 And finally, by using the linear proportionality between cytoplasm volume and  $N_o$ ,  $V_{cell} \propto N_o$ , we re-write  
679 it as our final formula used for the simulation:

$$680 \quad V_{cell} \propto \alpha \left( \sum_i A_i * P_i - \sum_j \min_{k \in S_j} (A_k * P_k) * |S_j| \right)$$

### 681 3. Simulation

682 The water abundance factor ( $\alpha$ ), accounts for the fraction of the intracellular water activity that is  
683 compensated by increased cell volume and the residual fraction contributes to the increased turgor of the  
684 cell. While  $\alpha$  is critical for accounting for the osmotic pressure, factors influencing the variation in  $\alpha$  are  
685 not well understood. In the simulations below, we focus on the qualitative predictions of our model  
686 regarding the cell volume and assume that  $\alpha$  is either identical across all aneuploids and euploids or varies  
687 randomly across strains. By comparing the predicted size of the cell with experimentally observed size of  
688 the cell in aneuploids, we could also infer the osmotic pressure predicted by our model.

689

#### 690 A simplified simulation of the model:

691 We first simulated the above model in a most simplified case, where all the complexes are present  
692 at the same abundance and are all composed of an identical number of proteins, that we assumed six.

693 The results of these simplified simulation showed a non-linear increase in cell size as a function of ploidy  
694 between 1N and 2N (Supplementary Method Fig. 4a). The overall shape appeared to be consistent with  
695 the experimental observations (Fig. 3b in Main Text).

696 Estimates of more realistic parameters from proteomics data

697 More realistic simulations require estimates of relative abundances of proteins and average sizes  
698 (number of subunits) of protein complexes in yeast. Relative proteins abundances were retrieved from the  
699 Pax-DB project dataset (Supplementary Method Fig. 4b)<sup>33</sup>, and average protein complex size was  
700 approximated with the average number of protein-protein interactions in which participating given protein  
701 participates based on the data for yeast from the Yu lab (Supplementary Method Fig. 4c)<sup>34</sup>. To limit the  
702 impact of the highly interacting hubs, we limited the distribution of protein complex sizes to 3-45 complex  
703 components.

704 Since the distribution of the protein-protein interactions may not an optimal estimator of complex  
705 size, we also used data from previous publications that attempted to measure the number of complex size  
706 distribution in yeast<sup>35</sup>. Based on the previously published mean and standard deviation for complex size,  
707 we assumed a gamma distribution limited to integers as the distribution of complex sizes and fitted its  
708 parameters to reproduce the mean (3.1) and standard deviation (2.5) of complex cores (Supplementary  
709 Method Fig. 4c).

710 Previous studies showed that the expression of proteins that participate in the same complex are in  
711 fact correlated in euploid cells, with estimates ranging from 0.5 to 0.9 depending on the complex types<sup>35</sup>.  
712 We account for the correlation of abundances between proteins that form complexes by introducing a  
713 correlation factor  $c_{complex}$  that adjust the abundance of all proteins in a complex towards their mean  
714 abundance,

$$715 \quad A'_i = A_i * (1 - c_{complex}) + c_{complex} \cdot \sum_{j \in complex} A_j.$$

716 Where  $A_i$  is protein abundance and  $A'_i$  is corrected protein abundance.

717

718 4. Simulations using estimated parameters

719 The simulation proceeds by stochastically choosing the abundances of proteins and stochastically  
720 grouping proteins into complexes. Both stochastic procedures are performed by sampling in the previously  
721 retrieved distributions.

722 Aneuploidy is simulated as a duplication of the amount of protein for a set of randomly chosen  
723 proteins, with the fraction of duplicated proteins proportional to the ploidy degree. By using the  
724 distribution of complex sizes based on the interaction partners proxy for complex sizes and by varying the  
725 correlation factor  $c_{complex}$  from 0.5 to 0.9, we obtain the cell diameter – ploidy correlation plot  
726 represented in Supplementary Method Fig. 5a. The shape of the curve is however dependent on the  
727 complex size distribution. By using the distribution of complex sizes based on the assumption of gamma  
728 distribution and fitted to previously published data we obtain the cell diameter-ploidy correlation plot  
729 represented in Supplementary Method Fig. 5b. More importantly, the exact shape is not only dependent  
730 on the distribution of the complex sizes, but also on the abundance of complexes of specific sizes. In order  
731 to demonstrate this, we used again the distribution of complex sizes based on the interaction partners  
732 proxy for complex sizes (as for Supplementary Method Fig. 5a) and manually added a highly abundant  
733 large complex (e.g. ribosomes), with size 45 and abundance equal to the average abundance of the 10  
734 most abundant proteins. The cell diameter-ploidy correlation can be seen in Supplementary Method Fig.  
735 5c.

736 The reason for such a modification of the curve is that it takes a higher average ploidy level for a  
737 large protein to have all its constitutive components duplicated so that it can finally assemble. This is  
738 represented in Supplementary Method Fig. 6a, where the total number of free molecules is decomposed  
739 into assembled complexes and free supernumerary proteins. For a mixture of complexes, the final total

740 molecule number curve is a linear combination of total molecule number curves for all protein sizes,  
741 pondered by their abundance.

742 In addition, to illustrate the effect of changing complex size, we use the same distribution of protein  
743 abundances and abundance correlation factor of 75%, but limiting the complex size to a single size  
744 (Supplementary Method Fig. 6b).

745 Since the cytoplasm is highly crowded and we are likely to observe deviations from ideal solutions,  
746 additional simulations were performed including an ideality correction factor. The cytoplasmic water  
747 potential was assumed to lie within a range where the real and ideal activities of water are in a linear  
748 relationship (i.e. Taylor series expansion of the first order is valid) such that,

$$749 \quad \alpha_{non-ideal} = (ideality\ correction\ factor) * \alpha_{ideal}$$

750 As expected, no qualitative differences in model predictions are observed. Simulations obtained by  
751 varying the ideality correction factor from 70% - 150% can be seen in Supplementary Method Fig. 7a.  
752 Furthermore, to account for difference in turgor pressure between euploid and aneuploid cells, simulations  
753 were performed varying the water abundance factor ( $\alpha$ ), which dictates the fraction of intracellular water  
754 that contributes to an increase in turgor. Simulations varying  $\alpha$  between 0.15-1 are included in  
755 Supplementary Method Fig. 7b. Since  $\alpha$  can vary across different aneuploid cells with random karyotypes,  
756 simulations were also performed with randomly assigned values of  $\alpha$  for each aneuploid ploidy level.  
757 Values of  $\alpha$  were restricted to 0.7 – 1.0 since 70 - 80% of the euploid yeast cytoplasm is composed of  
758 water<sup>7,8</sup>. As seen in Supplementary Method Fig. 7c, the overall predicted relationship in above simulations  
759 between cell volume and ploidy remains consistent.

760 We used the difference in the predicted cell size and experimentally observed cell sizes in order to  
761 predict the change in the water abundance factor  $\alpha$  and hence the turgor pressure change in aneuploids.

762 For each experimentally observed size at a given ploidy, we calculated the size predicted by the model,  
763 and the increase in the protein and complex concentration that would result in the decrease or increase of  
764 the cell size to the one observed experimentally, according to the formula below:

$$765 \quad \alpha = 1 - \frac{(1 - \alpha_0)}{V_{predicted} / V_{observed}}$$

766 Combined with the formula for turgor pressure mentioned above,

$$767 \quad \pi = -\frac{RT}{V_m} \ln(\alpha)$$

768 We obtain the final pressure from volumes ratio:

$$769 \quad \pi = -\frac{RT}{V_m} \ln \left( \alpha 1 - \frac{(1 - \alpha_0)}{V_{predicted} / V_{observed}} \right)$$

770 With estimated base turgor pressure of *S. cerevisiae* at 0.05 MPa, we used  $\alpha_0 = 0.69$ .

771 Depending on the parameter combinations used for the model simulation (Extended Data Fig. 3c), our  
772 model predicted varying degrees of increase in turgor pressure. For the majority of the parameter space,  
773 our model predicted the increase in turgor pressure in aneuploids. Depending on whether we attempted to  
774 manually account for the presence of abundant large complexes, our model predicted an increase in turgor  
775 pressure between 20% and 60% in median (Extended Data Fig. 3d), with turgor pressures of individual  
776 aneuploids up to 420% of euploid pressure. This is qualitatively consistent with the experimental  
777 observations.

778

779 5. Additional observations and qualitative predictions

780 Besides the prediction of cell size as a function of ploidy, the model can make two additional  
781 qualitative predictions. First, given that the amount of water required to achieve the same chemical  
782 potential of the solution is dependent only on the number of free solute molecules present in the solution,  
783 a solution with lighter solute molecules (single proteins vs protein complexes) would have a lower density.  
784 This prediction is validated in Main Text Fig. 3e.

785 Second, it can be predicted that diffusion of proteins in the cytoplasm would be faster (higher  
786 diffusion coefficient). Since we have observed a lower intracellular density in aneuploid cells, under the  
787 condition of constant density of all proteins and assuming that concentration is proportional to cell density,  
788 a lower intracellular density implies a lower mass concentration in aneuploid cells. This lower protein  
789 concentration leads to lower diffusion coefficients, since diffusivity varies inversely with total protein  
790 concentration. This is validated by diffusivity measurements of cytoplasmic GFP using FCS (Fig. 3d in  
791 Main Text).

792

793 **Theoretical model of transporter-dependent nutrient influx**

794 A predictive theoretical model was built to understand the possible causes and outcomes of  
795 disrupted transporter-regulated nutrient uptake in cells.

796

797 1. Generalized system (Supplementary Method Fig. 8a)

798 A simple flux-based ordinary differential equation (ODE) system, similar to the framework  
799 presented by Savir et al was used to model the regulation of transporter mediated nutrient uptake<sup>36</sup>. The

800 simplified system is comprised of the external nutrient,  $S_{ex}$ , the internal nutrient,  $S_{in}$ , the active transporter  
801 at the PM,  $T_{pm}$ .

$$802 \quad \frac{dS_{in}}{dt} = \alpha_s - \beta_s$$

803 (1)

$$804 \quad \frac{dT_{pm}}{dt} = \alpha_T - \beta_T$$

805 where  $\alpha_s$  and  $\beta_s$  are nutrient uptake and usage/efflux fluxes respectively;  $\alpha_T$  and  $\beta_T$  are transporter  
806 synthesis and downregulation fluxes respectively.

807

808 2. Model assumptions:

809 At any instant of time, the cell is in nutrient-rich media. It can be assumed that the external  
810 concentration is constant.

$$811 \quad S_{ex} \sim \text{constant}$$

812

813 We consider a general case where nutrient uptake, proportional to the number of transporters and flux per  
814 transporter  $u$ , follows Michaelian saturation kinetics.

815

$$816 \quad \alpha_s = T_{pm} \cdot u(S_{ex})$$

817

$$818 \quad u = \frac{\mu S_{ex}}{k + S_{ex}}$$

819 Nutrient usage/efflux is proportional to the internal nutrient concentration.

$$820 \quad \beta_s = k_s \cdot S_{in}$$

821 where  $k_s$  is the rate constant for nutrient usage/efflux

822 Transporter synthesis is transcriptionally regulated by internal nutrient concentration through an n-step  
823 negative feedback.

$$824 \quad \alpha_T = k^* \frac{K_{syn}^n}{K_{syn}^n + S_{in}^n}$$

825 where  $K_{syn}$  is the transporter synthesis saturation constant and  $n$  is the Hill coefficient

826 Transporter downregulation is governed by a nutrient-dependent feedback and is proportional to  
827 transporter concentration at the PM.

$$828 \quad \beta_T = k_i S_{in} T_{pm}$$

829 An outward turgor pressure  $\Delta P$  opposes invagination of the PM for endocytic downregulation of  
830 transporters. Transporter downregulation flux decreases with increase in turgor pressure.

$$831 \quad \beta_T = T_p(k_i \cdot S_{in} - \gamma[\Delta P - P'])$$

832 A simplified relationship between turgor pressure  $\Delta P$  and the concentrations of osmotically active  
833 molecules is

$$834 \quad \Delta P = RT(C_{in} - C_{out})$$

835 where  $C_{out}$  is the extracellular concentrations of osmolytes and  $C_{in}$  is the intracellular concentration.

$$836 \quad \beta_T = T_p(k_i \cdot S_{in} - \gamma[RT(C_{in} - C_{out}) - P'])$$

837



838 
$$\beta_T = T_p \cdot (k_i \cdot S_{in} - \Delta P^*)$$

839 where  $\Delta P^* = \gamma RT(C_{in} - C_{out}) - P'$

840 We consider a simple case where the turgor pressure is maintained constant by the balanced influx, efflux  
841 and production of osmotically active molecules.

842 
$$\Delta P^* = constant$$

843 Based on these assumptions, (1) is simplified to,

844 
$$\frac{dS_{in}}{dt} = T_{pm} \cdot u - k_s \cdot S_{in}$$

845 (2)

846 
$$\frac{dT_{pm}}{dt} = k^* \frac{K_{syn}^n}{K_{syn}^n + S_{in}^n} - T_{pm} \cdot (k_i \cdot S_{in} - \Delta P^*)$$

847

848 3. Model simulations and parameter analysis (Supplementary Method Fig. 8b-d)

849 Simulations were performed in MATLAB R2016b. Simulation states were computed using a stiff  
850 variable-order numerical differentiation solver. Model parameters were estimated by fitting experimental  
851 uptake kinetics of the glucose analog 2-NBDG in WT haploid cells with a termination tolerance of  $10^{-8}$   
852 on coefficients and function value.

853

854 **Reporting summary**

855 Further information on research design is available in the Nature Research Reporting Summary linked to  
856 this paper.

857

## 858 **Supplementary References**

859

- 860 1. Pavelka, N. *et al.* Aneuploidy confers quantitative proteome changes and phenotypic variation in  
861 budding yeast. *Nature* **468**, 321–325 (2010).
- 862 2. Tong, A. H. Y. & Boone, C. High-Throughput Strain Construction and Systematic Synthetic  
863 Lethal Screening in *Saccharomyces cerevisiae*. *Methods in Microbiology* **36**, 369–707 (2007).
- 864 3. Sheff, M. A. & Thorn, K. S. Optimized cassettes for fluorescent protein tagging in  
865 *Saccharomyces cerevisiae*. *Yeast* **21**, 661–670 (2004).
- 866 4. Huh, W.-K. *et al.* Global analysis of protein localization in budding yeast. *Nature* **425**, 686–691  
867 (2003).
- 868 5. Gasch, A. P. *et al.* Genomic Expression Programs in the Response of Yeast Cells to  
869 Environmental Changes. *Molecular Biology of the Cell* **11**, 4241–4257 (2000).
- 870 6. Miermont, A. *et al.* Severe osmotic compression triggers a slowdown of intracellular signaling,  
871 which can be explained by molecular crowding. *Proc. Natl. Acad. Sci. U.S.A.* **110**, 5725–5730  
872 (2013).
- 873 7. Granados, A. A. *et al.* Distributing tasks via multiple input pathways increases cellular survival in  
874 stress. *elifesciences.org* (2017). doi:10.7554/eLife.21415
- 875 8. Galitski, T., Saldanha, A. J., Styles, C. A., Lander, E. S. & Fink, G. R. Ploidy regulation of gene  
876 expression. *Science* **285**, 251–254 (1999).
- 877 9. Sheltzer, J. M. A transcriptional and metabolic signature of primary aneuploidy is present in  
878 chromosomally unstable cancer cells and informs clinical prognosis. *Cancer Res.* **73**, 6401–6412  
879 (2013).
- 880 10. Roschke, A. V. *et al.* Karyotypic complexity of the NCI-60 drug-screening panel. *Cancer Res.* **63**,  
881 8634–8647 (2003).
- 882 11. Shankavaram, U. T. *et al.* CellMiner: a relational database and query tool for the NCI-60 cancer  
883 cell lines. *BMC Genomics* **10**, 277 (2009).
- 884 12. Supek, F., Bošnjak, M., Škunca, N. & Šmuc, T. REVIGO summarizes and visualizes long lists of  
885 gene ontology terms. *PLoS ONE* **6**, e21800 (2011).
- 886 13. Varma, S., Pommier, Y., Sunshine, M., Weinstein, J. N. & Reinhold, W. C. High resolution copy  
887 number variation data in the NCI-60 cancer cell lines from whole genome microarrays accessible  
888 through CellMiner. *PLoS ONE* **9**, e92047 (2014).
- 889 14. Dolfi, S. C. *et al.* The metabolic demands of cancer cells are coupled to their size and protein  
890 synthesis rates. *Cancer Metab* **1**, 20 (2013).
- 891 15. Zielinski, D. C. *et al.* Systems biology analysis of drivers underlying hallmarks of cancer cell  
892 metabolism. *Sci Rep* **7**, 41241 (2017).
- 893 16. Lang, M. J. *et al.* Glucose starvation inhibits autophagy via vacuolar hydrolysis and induces  
894 plasma membrane internalization by down-regulating recycling. *Journal of Biological Chemistry*  
895 **289**, 16736–16747 (2014).

- 896 17. Butt, H. J. & Jaschke, M. Calculation of thermal noise in atomic force microscopy.  
897 *Nanotechnology* **6**, 1
- 898 18. Arfsten, J., Leupold, S., Bradtmöller, C., Kampen, I. & Kwade, A. Atomic force microscopy  
899 studies on the nanomechanical properties of *Saccharomyces cerevisiae*. *Colloids Surf B*  
900 *Biointerfaces* **79**, 284–290 (2010).
- 901 19. Carvalho, F. A. *et al.* Atomic force microscopy-based molecular recognition of a fibrinogen  
902 receptor on human erythrocytes. *ACS Nano* **4**, 4609–4620 (2010).
- 903 20. Johnson, K. L. *Contact Mechanics*. (Cambridge University Press, 2009).
- 904 21. Touhami, A., Nysten, B. & Dufrêne, Y. F. Nanoscale Mapping of the Elasticity of Microbial  
905 Cells by Atomic Force Microscopy. *Langmuir* **19**, 4539–4543 (2003).
- 906 22. Bailey, R. G. *et al.* The interplay between cell wall mechanical properties and the cell cycle in  
907 *Staphylococcus aureus*. *Biophys. J.* **107**, 2538–2545 (2014).
- 908 23. Slaughter, B. D., Schwartz, J. W. & Li, R. Mapping dynamic protein interactions in MAP kinase  
909 signaling using live-cell fluorescence fluctuation spectroscopy and imaging. *Proc. Natl. Acad.*  
910 *Sci. U.S.A.* **104**, 20320–20325 (2007).
- 911 24. Boeke, D. *et al.* Quantification of cytosolic interactions identifies Ede1 oligomers as key  
912 organizers of endocytosis. *Mol. Syst. Biol.* **10**, 756 (2014).
- 913 25. Colombo, R. *et al.* Targeting the mitotic checkpoint for cancer therapy with NMS-P715, an  
914 inhibitor of MPS1 kinase. *Cancer Res.* **70**, 10255–10264 (2010).
- 915 26. Potapova, T. A., Seidel, C. W., Box, A. C., Rancati, G. & Li, R. Transcriptome analysis of  
916 tetraploid cells identifies cyclin D2 as a facilitator of adaptation to genome doubling in the  
917 presence of p53. *Molecular Biology of the Cell* **27**, 3065–3084 (2016).
- 918 27. Liu, G., Lanham, C., Buchan, J. R. & Kaplan, M. E. High-throughput transformation of  
919 *Saccharomyces cerevisiae* using liquid handling robots. *PLoS ONE* **12**, e0174128 (2017).
- 920 28. Lawless, C., Wilkinson, D. J., Young, A., Addinall, S. G. & Lydall, D. A. Colonyzer: automated  
921 quantification of micro-organism growth characteristics on solid agar. *BMC Bioinformatics* **11**,  
922 287 (2010).
- 923 29. Hubert, M. & Vandervieren, E. An adjusted boxplot for skewed distributions. *Computational*  
924 *Statistics & Data Analysis* **52**, 5186–5201
- 925 30. Levy, S. F., Ziv, N. & Siegal, M. L. Bet hedging in yeast by heterogeneous, age-correlated  
926 expression of a stress protectant. *PLoS Biol.* **10**, e1001325 (2012).
- 927 31. Torres, E. M. *et al.* Identification of aneuploidy-tolerating mutations. *Cell* **143**, 71–83 (2010).
- 928 32. Tao, J. & Sun, S. X. Active Biochemical Regulation of Cell Volume and a Simple Model of Cell  
929 Tension Response. *Biophys. J.* **109**, 1541–1550 (2015).
- 930 33. Wang, M., Herrmann, C. J., Simonovic, M., Szklarczyk, D. & Mering, von, C. Version 4.0 of  
931 PaxDb: Protein abundance data, integrated across model organisms, tissues, and cell-lines.  
932 *Proteomics* **15**, 3163–3168 (2015).
- 933 34. Das, J. & Yu, H. HINT: High-quality protein interactomes and their applications in understanding  
934 human disease. *BMC Syst Biol* **6**, 92 (2012).
- 935 35. Gavin, A.-C. *et al.* Proteome survey reveals modularity of the yeast cell machinery. *Nature* **440**,  
936 631–636 (2006).
- 937 36. Savir, Y., Martynov, A. & Springer, M. Achieving global perfect homeostasis through transporter  
938 regulation. *PLOS Computational Biology* **13**, e1005458 (2017).
- 939  
940

941 **Supplementary Method Figure 1.**

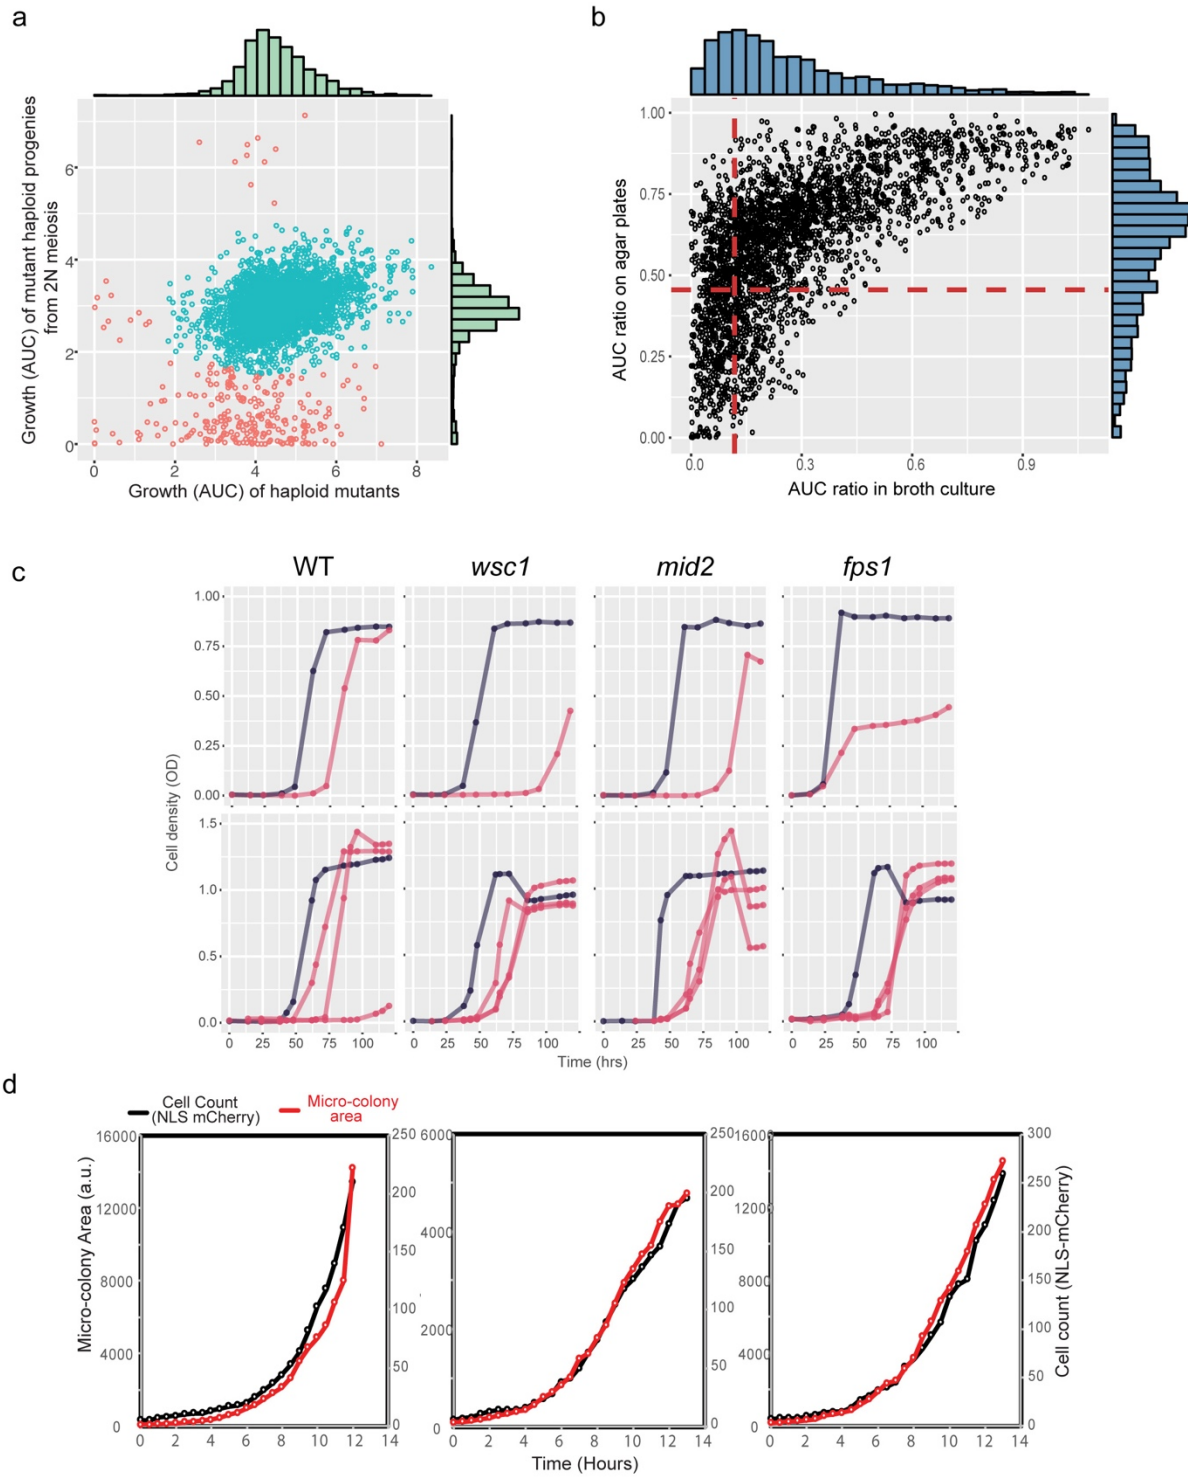

942

943

944 **Supplementary Method Figure 1 | Experimental validation of gene candidates required for**  
 945 **optimal aneuploid growth.**

946 **(a)** Growth capacity from two haploid deletion collections were compared to rule out gene deletions  
947 causing meiotic or germination defects. X-axis represents the AUC of growth measurements from the  
948 parental haploid deletion collection; Y-axis represents AUC of growth measurements from haploid  
949 progeny from homozygous diploid deletion collection. Each dot represents one strain with a unique gene  
950 deletion, and cluster analysis (db-scan) shows a main group (cyan) and outliers (red); the red group below  
951 the blue cloud are likely to correspond to gene deletions with meiotic or germination defects (red). **(b)**  
952 Results of two independent growth measurements (agar and broth cultures), represented by ratio of Area  
953 Under a Curve (AUC) between aneuploid and haploid cell populations of the same genotype, were  
954 correlated in the central dot plot (Spearman's rank correlation = 0.701, p-value < 2.2E-16). Each black  
955 circle represents the AUC ratio of a genotype. Histograms on the top (X-axis) and to the right (Y-axis)  
956 represent the AUC ratio distribution of screened mutant populations from broth and agar cultures,  
957 respectively. Vertical and horizontal red lines are the cutoff of the lowest quartile of these two ratio  
958 distributions. **(c)** Three mutants of genes related to cell wall integrity (CWI) pathway were gene candidates  
959 from the primary screen (growth curves shown in top panels; black: haploid; red: aneuploids). These  
960 mutants were eliminated in the secondary screen of validations with larger population size and two  
961 additional replicates (bottom panels; black: haploid; red: aneuploids). This was likely due to the presence  
962 of adaptive variants in the larger mutant aneuploid populations. **(d)** Three representative growth curves of  
963 micro-colonies of cells expressing NLS-mCherry. Cell counts (black) were from the counts of nuclear  
964 signal of NLS-mCherry; micro-colony area (red) was measured for each time point with 30 min time  
965 interval.

966

967

968

969

970

971

972

973

974

975 **Supplementary Method Figure 2.**

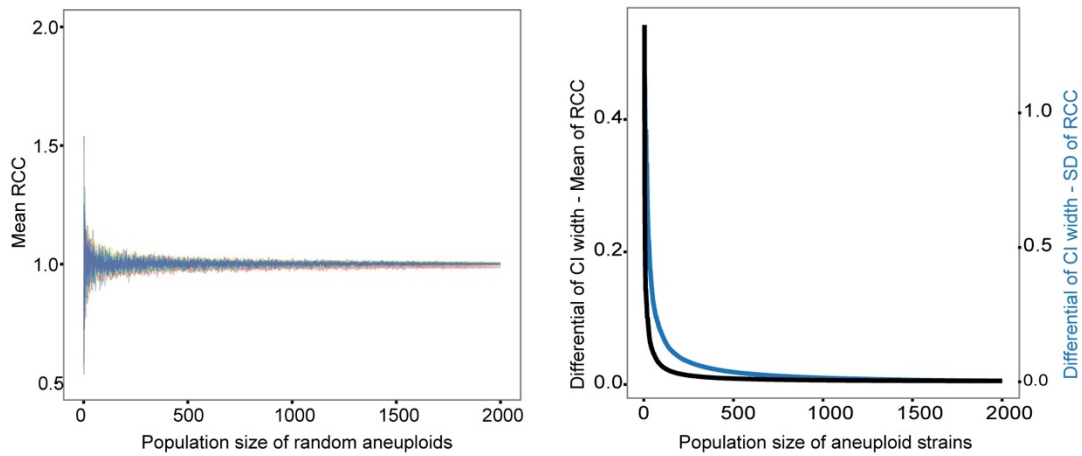

976

977

978

979 **Supplementary Method Figure 2 | A statistical model estimates the size for an aneuploid**  
980 **population to have unbiased chromosome stoichiometry.**

981 Left panel: mean of relative chromosome copy number (RCC) (y-axis) was calculated with increasing  
982 sample size (x-axis) to identify the minimal size to reach equal appearance of each chromosome in a  
983 population. Each line with different colors indicates 16 independent tests, representing 16 chromosomes  
984 in the yeast genome. Right panel: convergence of the confidence interval (CI) for mean RCC (black) and  
985 SD of RCC (blue) with increasing population size of random aneuploids.

986

987

988

989

990

991

992 **Supplementary Method Figure 3.**

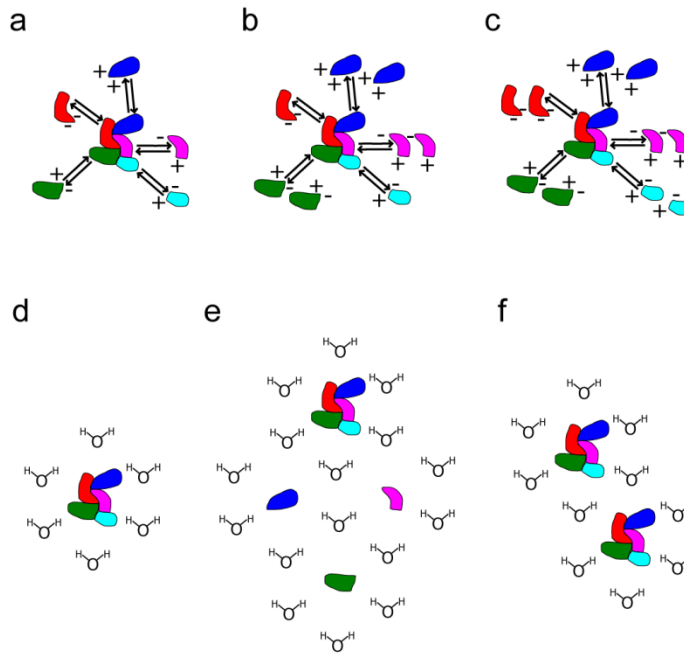

993

994

995

996 **Supplementary Method Figure 3 | Schematic representation of the effect of proteome imbalance,**  
997 **caused by aneuploidy, on osmotic pressure and cell volume.**

998 **(a)** and **(d)** In the euploid state, protein complex components are roughly balanced in their expression and  
999 exist in an equilibrium with the complex. Thus, the number of free proteins not participating in complexes  
1000 is minimal and requires a minimal amount of water to dilute. **(b)** and **(e)** In the aneuploid state, some  
1001 components of the complex are present in supernumerary amounts relative to the complex stoichiometry.  
1002 Due to gene dosage imbalance, these supernumerary components cannot assemble into complexes, thus  
1003 increasing the total number of solute molecules and requiring a higher amount of water to dilute  
1004 themselves. **(c)** and **(f)** Once the next euploid stage is reached, the gene balance is restored and the amount  
1005 of supernumerary free proteins falls back to the minimal level, and the total level of the solute simply  
1006 scales with the previous (lower) euploid state.

1007

1008

1009 **Supplementary Method Figure 4.**

1010

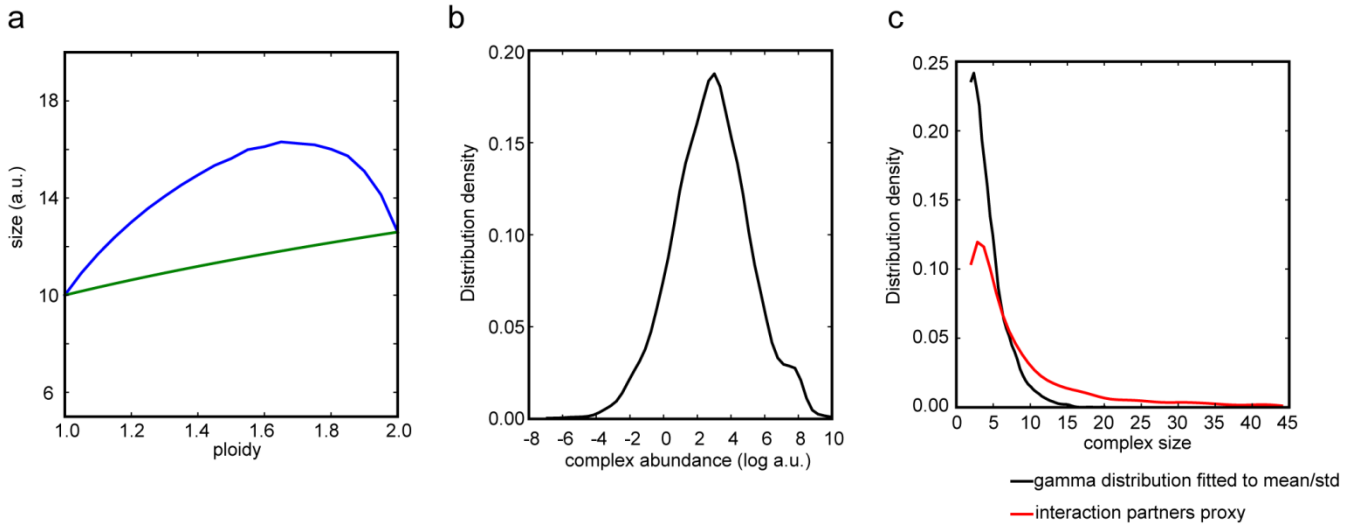

1011

1012

1013

1014 **Supplementary Method Figure 4 | Simulations of cell diameter change with aneuploidy in**  
1015 **idealized case and distributions of realistic estimates proteins abundance and complex size.**

1016 (a) Cell size as a function of ploidy in an idealized case where all complexes are of the same size (size  
1017 per complex) and abundance. (b) Distribution of estimated log-abundances of proteins. (c) Complex size  
1018 distribution based on interaction partners (red) or by assuming a gamma distribution on integer support  
1019 with fixed mean and standard deviation (black).

1020

1021

1022

1023

1024



1025 **Supplementary Method Figure 5.**

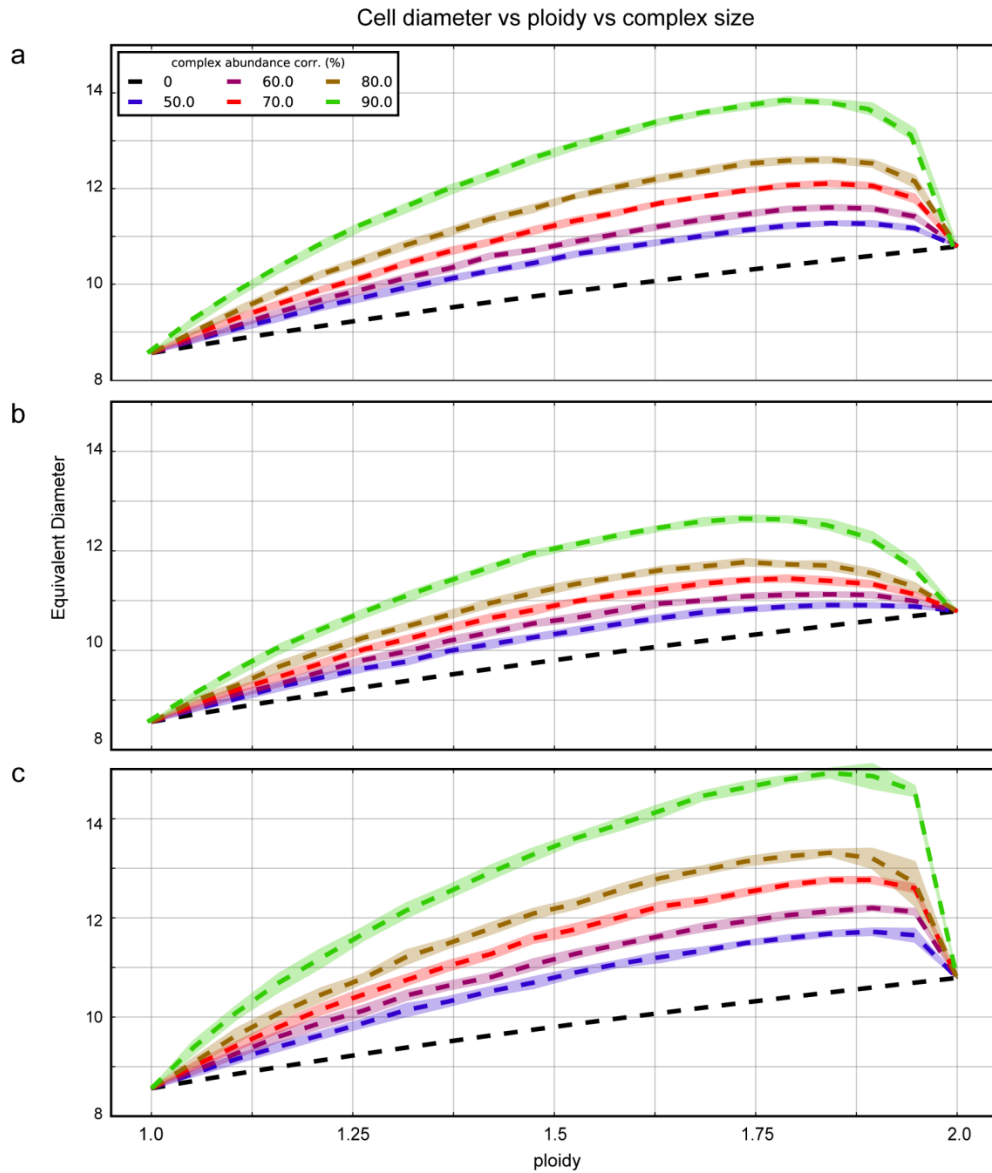

1026

1027 **Supplementary Method Figure 5 | Simulation with a range of correlation factors and complex**  
1028 **abundance distribution**

1029 Estimated cell volume changes when aneuploidy confers gene dosage imbalance, based on (a) the protein-  
1030 protein interaction, (b) from previously published mean and standard deviation of complex sizes, and (c)  
1031 from protein-protein interaction and manual injection of large abundant proteins. Bands are standard  
1032 deviation intervals in the simulation. The plot has been normalized to match the experimentally observed  
1033 haploid diameter.

1034

1035 **Supplementary Method Figure 6.**

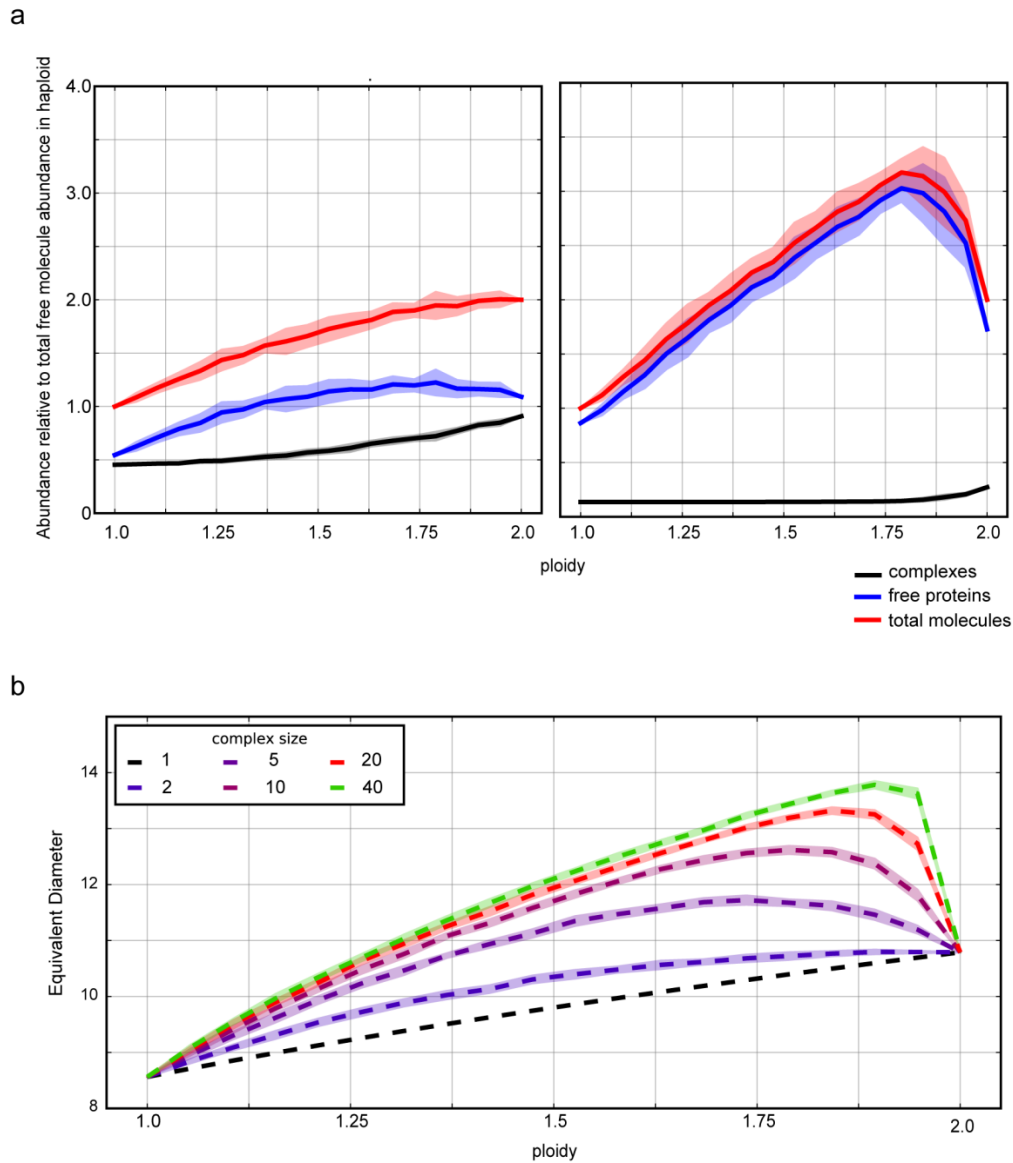

1036

1037

1038 **Supplementary Method Figure 6 | Impact of complex size distribution on free molecule number as**  
 1039 **function of ploidy**

1040 **(a)** Simulations for the number of independent molecules (red) based on free proteins (blue) and assembled  
 1041 complexes (black) contained in complexes of a given size (3 and 15), as a function of ploidy. Margins are  
 1042 standard deviations based on multiple simulation runs. Simulations performed for a fixed complex  
 1043 member abundance correlation of 70%. **(b)** Simulation of cell diameter as a function of ploidy for different  
 1044 complex sizes and abundance correlation of 70%.

1045 **Supplementary Method Figure 7.**

1046

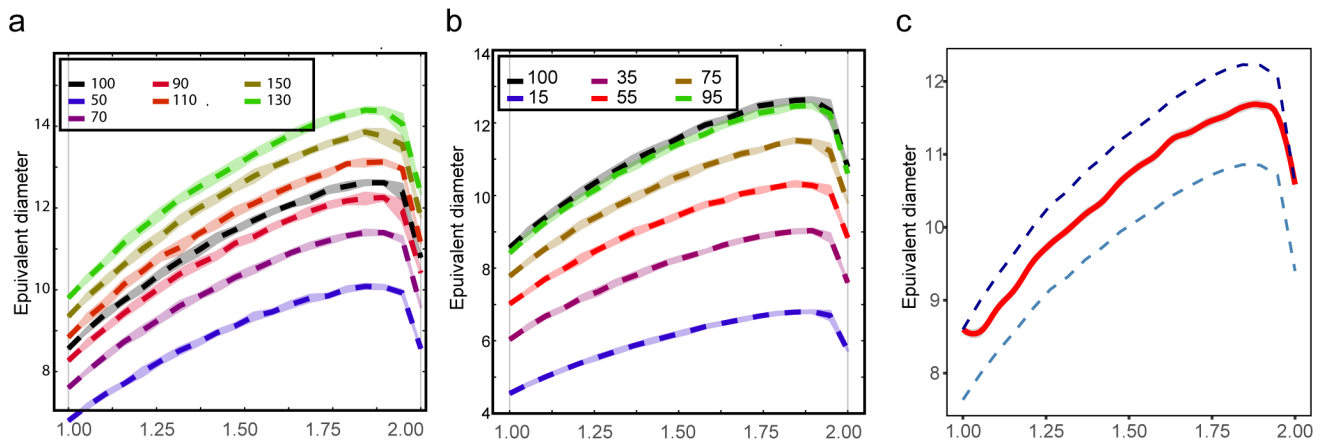

1047

1048

1049 **Supplementary Method Figure 7 | Simulations with a range of ideality correlation factors and**  
1050 **water abundance factor.**

1051 **(a)** Estimated cell volume of aneuploid cells as a function of ploidy and water potential. A range of ideality  
1052 correlation factors of water activities were included in the simulation and no qualitative difference was  
1053 detected. **(b)** Estimated cell volume of aneuploid cells as a function of ploidy and constant water  
1054 abundance factor ( $\alpha$ , compensated by cell volume and its residual fraction leads to increased turgor).  
1055 Bands are standard deviation intervals in the simulation.

1056 **(c)** Estimated cell volume of aneuploid cells as a function of ploidy and varying water abundance factor  
1057 randomly assigned across ploidy levels. Loess fitted prediction obtained from 100 simulation runs  
1058 randomly varying  $\alpha$  between 0.7-1.0 across strains within every run (red). Dotted lines indicate  
1059 simulations with constant alpha values of 70% (dark blue) and 100% (light blue) across all strains. While  
1060 the estimations were made in a heterogeneous aneuploid population, varying  $\alpha$  factor at each ploidy level  
1061 does not cause qualitative changes.

1062

1063

1064

1065

1066

1067

1068

1069

1070

1071 **Supplementary Method Figure 8.**

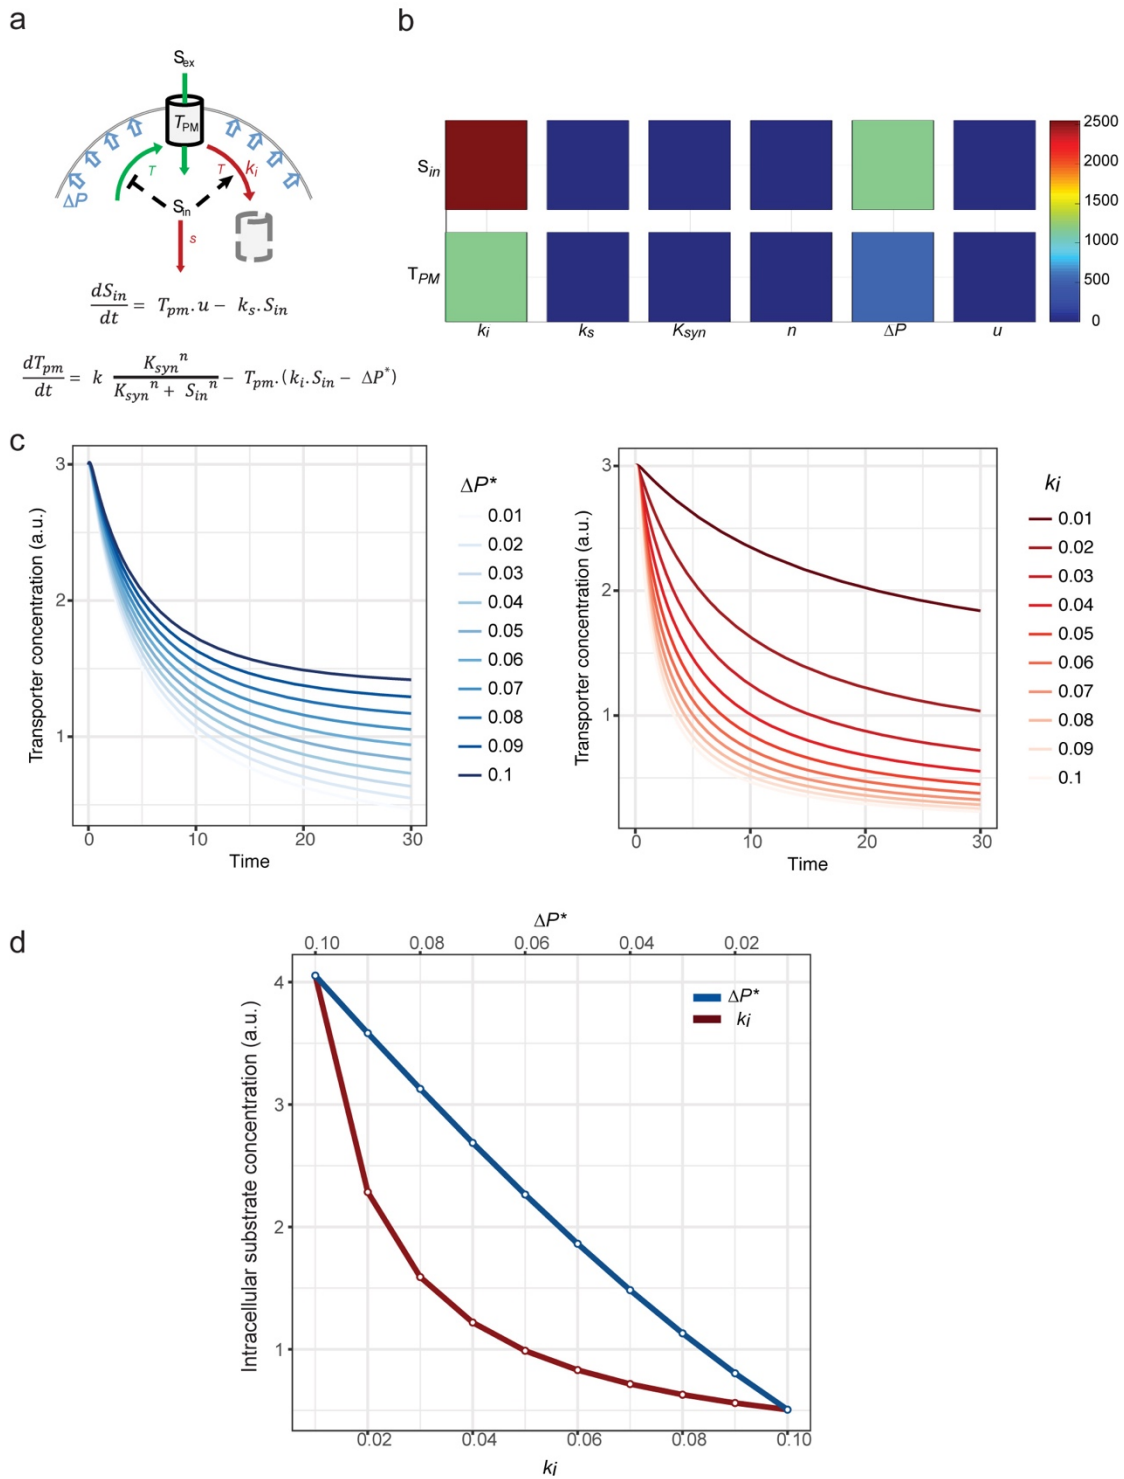

1072

1073

1074

1075

**Supplementary Method Figure 8 | Parameter scan in a mathematical model of PM transporter and nutrient homeostasis.**

1076 **a.** Schematic of the transporter dependent nutrient uptake system. The model considers a PM transporter  
1077 ( $T_{PM}$ ), which transports extracellular substrates into the cell (extracellular and intracellular concentration:  
1078  $S_{ex}$  and  $S_{in}$ ). Transporter synthesis (green curved arrow, increase of  $T_{PM}$ : T in green) and endocytic  
1079 downregulation (red curved arrow, reduction of  $T_{PM}$ : T in red) are affected by  $S_{in}$  (symbols with dotted  
1080 lines). Red straight arrow represents the spending (reduction of  $S_{in}$ : s in red) of intracellular substrates.  
1081 Turgor pressure (blue open arrows) opposes transporter endocytic downregulation and is incorporated into  
1082 model equations (bottom). Parameter sensitivity analysis (non-normalized) **(b)** and parameter scans **(c)**  
1083 revealed that the turgor pressure parameter ( $\Delta P^*$ ) and rate constant ( $ki$ ) of substrate-dependent transporter  
1084 down-regulation alter nutrient uptake kinetics as well as the steady-state intracellular nutrient  
1085 concentration the most, also shown in **(d)**: y-axis (substrate concentration) and x-axis (time) are unit-less  
1086 with arbitrary scales. Scales in each panel are independent and not comparable.

1087

1088

1089

1090

1091

1092

1093

1094

1095

1096

1097

1098

1099

1100

1101

1102

1103

1104

1105

1106

1107

1108

1109 **Supplementary Table List**

1110 Supplementary Table 1. Transcriptomic analysis in aneuploid populations.

1111 Supplementary Table 2. Correlation analysis between CAGE genes and those in cells under different  
1112 stress conditions.

1113 Supplementary Table 3. Gene ontology analysis

1114 Supplementary Table 4. Genome-wide ORF deletion screen in heterogeneous aneuploid populations

1115 Supplementary Table 5. Summary of tetrad dissection analysis and micro-colony assay

1116 Supplementary Table 6. Amino acid analysis

1117 Supplementary Table 7. Meta-analysis of NCI-60 cancer cell lines.

1118 Supplementary Table 8. Cell surface stiffness in yeast and human cells from AFM.

1119 Supplementary Table 9. Yeast strains and plasmids

1120

1121

1122
